# Supplementary material
Source: PubMed Central journal article supplement (PMC6800346)
Supplement: pnas.1906843116.sapp.pdf [file pnas.1906843116.sapp.pdf]

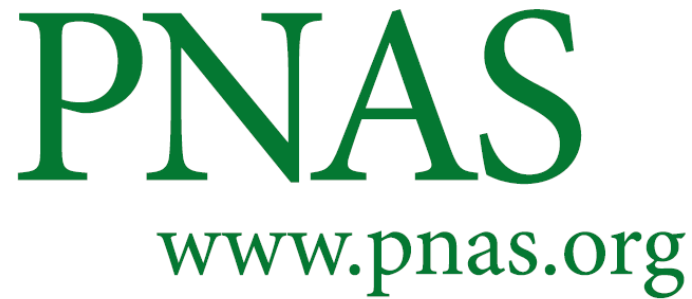

## Supplementary Information for

### **Rationally engineered *Staphylococcus aureus* Cas9 nucleases with high genome-wide specificity**

Yuanyan Tan\*, Athena H. Y. Chu\*, Siyu Bao, Duc Anh Hoang, Firaol Tamiru Kebede, Wenjun Xiong, Mingfang Ji, Jiahai Shi, Zongli Zheng

Correspondence: Jiahai Shi and Zongli Zheng  
Email: Jiahai.Shi@cityu.edu.hk; ZhengZongli@gmail.com

#### **This PDF file includes:**

- Supplementary Material and Methods
- Figures S1 to S8
- Tables S1 to S5
- References

## Supplementary Material and Methods

**Protein structure analysis** Pymol (The PyMOL Molecular Graphics System, Version 2.0 Schrödinger, LLC.) was used to view protein structure of SaCas9 (PDB ID 5AXW and 5CZZ) and calculate polar contact between proteins and DNA.

**Plasmids and oligonucleotides.** The plasmid BPK2139 (Addgene #65776) was used to express WT-SaCas9 and variant mutagenesis. All mutant SaCas9 (including S-HF) expression plasmids (Table S1) were constructed by site-directed mutagenesis using BPK2139 as the backbone (Guangzhou IGE biotechnology Ltd.). High-fidelity SpCas9 variant expressing plasmids were purchased from Addgene (eSpCas9(1.1), #71814, SpCas9-HF1 #72247 and HyPa-Cas9 #101178). Sequences of mutated plasmids were confirmed by Sanger sequencing. The sgRNA expression plasmids for SaCas9 were constructed by ligating oligonucleotide duplexes (synthesized by BGI Tech Solution Co. Ltd.) of the sgRNA (Table S2, S3) into BsmBI digested BPK2660 plasmid (Addgene #70709). The sgRNA expression plasmids for SpCas9 were constructed by ligating sgRNA into BsmBI digested BPK1520 plasmid (Addgene #65777). All plasmids were purified with the PureLink™ HiPure Plasmid Midiprep Kit (Invitrogen) and quantified by NanoDrop 2000.

**Cell culture and transfection.** The 293T cells were purchased from ATCC (CRL-3216), and the 293T-EGFP cell was a gift from Dr. Minh Le of City University of Hong Kong. Cells were cultured in advanced DMEM medium (Life Technologies) with 10% fetal bovine serum (Biosera) and 1% antibiotic (Life Technologies) in 5% CO<sub>2</sub> cell culture incubator. Transfection were performed using PEI (*Polyethylenimine*) for 293T following the manufacturer's instruction.  $7.5 \times 10^4$  cells were transfected with a total of 400 ng SaCas9 plasmid DNA and 400 ng sgRNA plasmid in 24-well plate. WT-SaCas9 was co-transfected with a U6-null BPK2660 plasmid as the no-sgRNA negative control.

**DNA extraction.** Genomic DNA were extracted using the MiniBEST Universal Genomic DNA Extraction Kit (TaKaRa), and quantified using the Qubit 3.0 fluorometer and Qubit™ dsDNA HS Assay Kit (Invitrogen).

**Targeted deep sequencing.** Genomic regions (listed in Table S2) encompassing on-target sites of the 27 sgRNA examined (Table S2, S3) and a selection of off-target sites targeted by VEGFA\_8, FANCF\_13, EMX1\_6 and RUNX1\_13 were subjected to amplicon sequencing to evaluate editing efficiency of the SaCas9. Specifically, genomic DNA (20 ng for on-target site and 10 ng for off-target site) was used for PCR using target specific forward/reversed primers (Table S4) and Platinum Taq DNA polymerase (Thermo Fisher Scientific) by the following condition: 95°C for 5 min, 14 cycles of [95°C for 30 sec, 72°C touchdown at -1°C per cycle for 1 min], 20 cycles of [95°C for 30 sec, 58°C for 1 min], 72°C for 3 min and hold at 4°C. The product was used for a second PCR step to introduce Illumina sequencing sequences by the following condition: 95°C for 5 min, 20 cycles of [95°C for 30 sec, 65°C for 1 min], 72°C for 3 min and hold at 4°C. The sequencing libraries were quantified by qPCR (KAPA Library Quantification Kits for Illumina) and sequenced on Illumina NextSeq 500 System using 300-cycle kit

for 2x150 sequencing. The FASTQ reads were aligned to the human reference genome GrCh37 using BWA MEM<sup>1</sup> with default parameters. High-quality mapped read pair (properly mapped read-pair that contain at least 30 bp of matching alignment to the reference genome) were used for assessing the editing efficiency. Editing efficiency for each SaCas9 variant was measured as the number of reads containing InDels within the surveyed site, excluding the PCR primer annealing regions, divided by the total number of reads spanning the surveyed site, using an in-house Python script.

**EGFP disruption assay.** EGFP disruption assays were performed to assess on-target activity of wild-type and mutant SaCas9s with the sgRNA targeted to EGFP gene in the 293T-EGFP cell. Briefly,  $7.5 \times 10^4$  293T-EGFP cells were transfected with 500 ng WT or mutant SaCas9 expressing plasmid and 250 ng of EGFP targeted sgRNA (either with or without mismatches to the target site) expression plasmid. The 293T-EGFP cell co-transfected with SaCas9 expression plasmid and the U6-null plasmid was used as baseline negative control for SaCas9 editing. The fluorescence of the transfected cells was measured by flow cytometry. On-target efficiency is measured as the loss of fluorescence upon co-transfection of sgRNA and SaCas9 expression plasmids and normalized to the mentioned negative control.

**GUIDE-seq.** Genomic DNA were extracted 72 h post-transfection and 400 ng was used for NGS library construction following the GUIDE-seq<sup>2</sup> methods with minor modification. Briefly, DNA was enzymatically fragmented by KAPA Frag Kit (KAPA Biosystems), followed by adaptor ligation and two rounds of hemi-nested PCR enrichment for dsODN integration fragments. To unify Illumina sequencing workflows for obtaining dual indexed data using Single-Indexed sequencing workflow across various Illumina platforms, we redesigned the original half-functional adaptors<sup>3</sup> and placed sample index (Index 2) at the head of Read 1, following unique molecular index (Table S5). Final sequencing libraries were quantified by qPCR (KAPA Library Quantification Kits for Illumina) and sequenced on Illumina NextSeq 500 System. Data demultiplexing of Index 1 was performed by bcl2fq v2.19, followed by custom scripts for Index 2 demultiplexing, adaptor trimming using the BBduk tool<sup>4</sup>, and formatting for analysis using the GUIDE-seq software<sup>5</sup>. Briefly, demultiplexed and unique molecular index (UMI)-tagged FASTQ data was consolidated to generate UMI-consensus sequence, and aligned to human reference genome GrCh37 using BWA MEM<sup>1</sup>. High-quality alignments (MAPQ  $\geq$  50) were used for identifying genomic regions with the dsODNs integration as SaCas9 edited sites. Off-target sites with up to 7 mismatches edited by SaCas9, and 6 mismatches edited by SpCas9 within the protospacer region were identified.

**AAV transduction** The plasmid pAAV-CMV-SaCas9-2A-mCherry-U6-Bsal-sgRNA was cloned by PCR amplifying the 2A-mCherry fragment (Forward primer: 5'-CGCGGATCCGAGGGCAGAGGCAG-3'; reverse primer: 5'-CCGGAATTCTTACTTGTACAGCTCGTCCATGC-3') and ligating it via BamHI/EcoRI sites into the backbone plasmid pAAV-CMV-SaCas9-U6-Bsal-sgRNA (Addgene #61591). The WT-SaCas9 human optimized codon (pCAG-WT-SaCas9) was obtained from Addgene (Addgene #65776). The WT-SaCas9 or SaCas9-HF was cloned

into the pAAV-CMV-SaCas9-2A-mCherry-U6-Bsal-sgRNA to replace the original SaCas9 via AgeI/XhoI sites. The *VEGFA* gRNA was inserted into the pAAV backbone via BsaI sites. The control vector pAAV-CMV-mCherry-U6 *Rho* gRNA was used. For packaging AAV8 virus, pAAV rep/Cap2/8 and adenovirus helper plasmids were obtained from the University of Pennsylvania Vector Core (Philadelphia, USA). Recombinant AAV8 vectors were produced as previously described<sup>6</sup>. Briefly, pAAV vector plasmid, rep/cap 2/8 packaging plasmid, and adenoviral helper plasmid were mixed with polyethylenimine (PEI) with a ratio of DNA:PEI=1:3 in DMEM. The mixture was incubated 15 min at room temperature and added to HEK293T cells (HCL4517; Thermo Scientific) cultured in DMEM with 2% NuSerum growth medium supplement (Corning). The transfected medium was replaced by DMEM after 24 hours, and the supernatant was collected at 72 hours after transfection. The AAV8 virus supernatant was precipitated (mixed with 8.5% wt/vol PEG-8000 and 0.4 M NaCl for 2h at 4 °C), centrifuged at 7,000 × *g* for 10 min, and resuspended in virus buffer (150 mM NaCl and 20 mM Tris, pH 8.0). The virus supernatant was ultra-centrifuged under iodixanol gradient at 147,000 × *g* at 4°C for 90 min. The collected fraction of AAV8 vectors (40% iodixanol fraction) were washed three times with PBS using Amicon 100K columns (EMD Millipore). The virus titers were quantified by protein SDS-PAGE gel and SYPRO® Ruby protein gel stain (Thermo Fisher Scientific).

ARPE-19 (ATCC® CRL-2302™) cells were cultured in DMEM/F12 with 10%FBS and incubated at 37 °C , 5% CO<sub>2</sub>. ARPE-19 cells were transduced with AAV8 vectors as described by the Viral Vector Core Facility, University of Iowa Health Care. In brief, the AAV8 vectors were diluted in transduction medium (DMEM/F12, 2% FBS, 2μM Hoechst-33342) at room temperature and inoculated at 10<sup>5</sup> viral genomes per cell (vg/cell) of ARPE-19 cells incubated at 37°C, 5% CO<sub>2</sub>. The cells incubated with the transduction medium and without AAV vector transduction were used as the untransduction control. The transduction medium was replaced with full medium (DMEM/F12, 10% FBS) at 24 hours after transduction. The cells were harvested for genomic DNA extraction at 72 hours after transduction. Genomic DNAs were extracted by PureLink™ Genomic DNA Mini Kit (Thermo Fisher Scientific).

**Data analysis.** Sequencing data is deposited under the European Nucleotide Archive (PRJEB31487). We performed statistical analyses and graph plotting in R 3.5.2<sup>7</sup> using the dplyr<sup>8</sup>, tidyr<sup>9</sup>, ggplot2<sup>10</sup> and VennDiagram<sup>11</sup> packages.

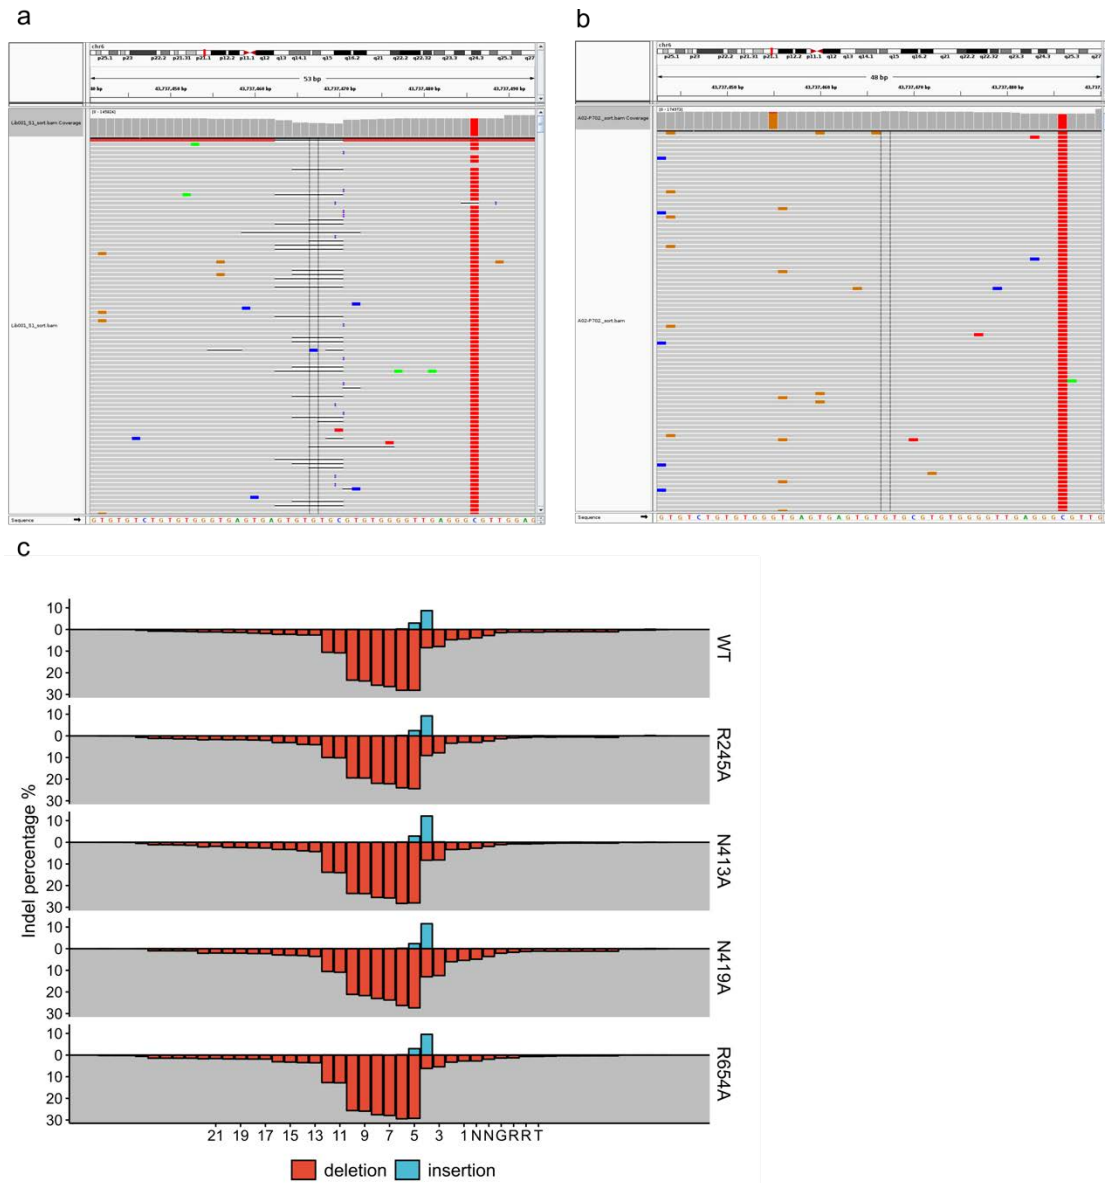

**Fig. S1. Indel profile of SaCas9 targeting VEGFA\_8 in HEK293T cells.** IGV snapshots showing the insertions and deletions sequences of WT-SaCas9 editing in HEK293T **(a)** and the respective negative control of untreated cells **(b)**. Indel profiles **(c)** showing per base insertion and deletion percentages (y-axis) introduced by WT-SaCas9 and the four single mutants: R245A, N413A, N419A, and R654A. The x-axis specifies the protospacer position (21-1) followed by the NNGRRT PAM site.

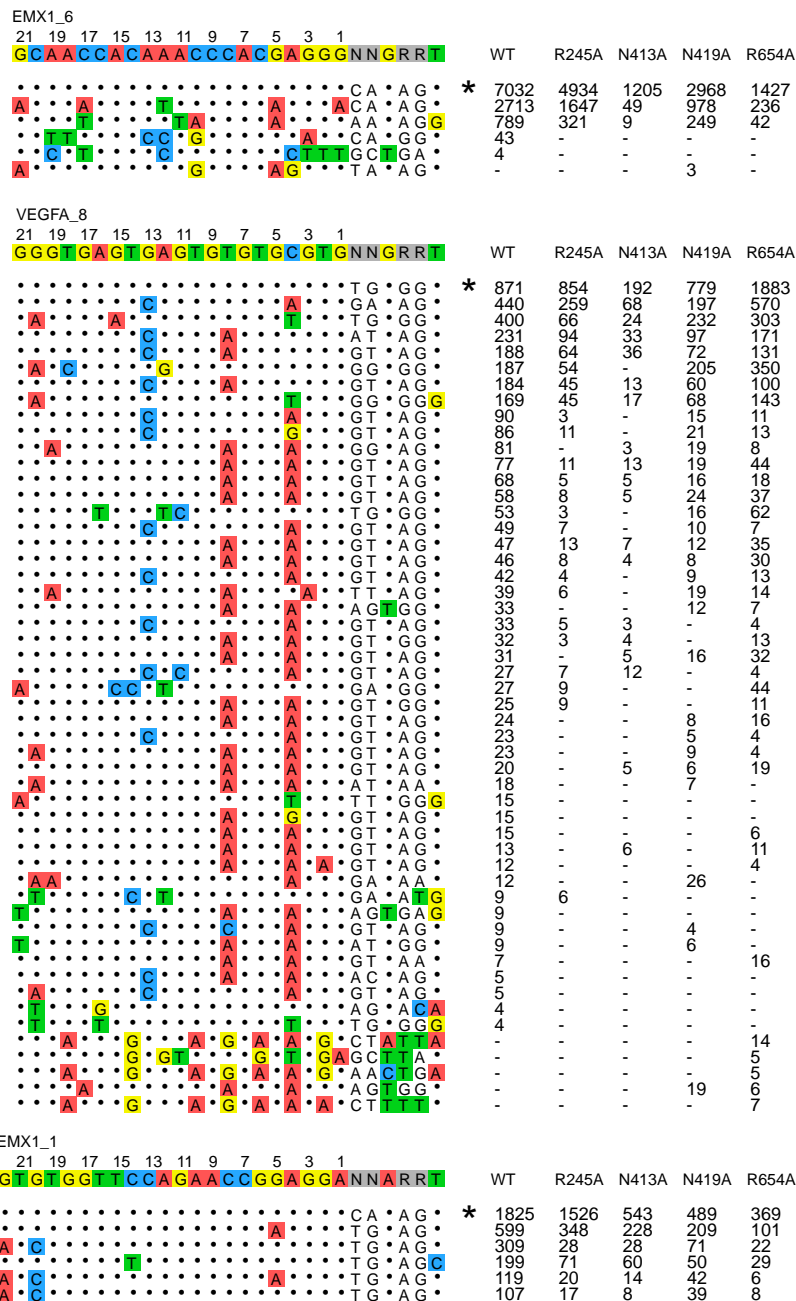

**Fig. S2: Genome-wide editing results of WT and single-substitution SaCas9 variants at EMX1\_6, VEGFA\_8, and EMX1\_1 using GUIDE-seq.** Genome-wide cleavage sites detected by GUIDE-seq. Read counts listed in the right represent number of GUIDE-seq reads. On target site is indicated with “\*”. Mismatched bases in off-target sites with the on-target site are highlighted.

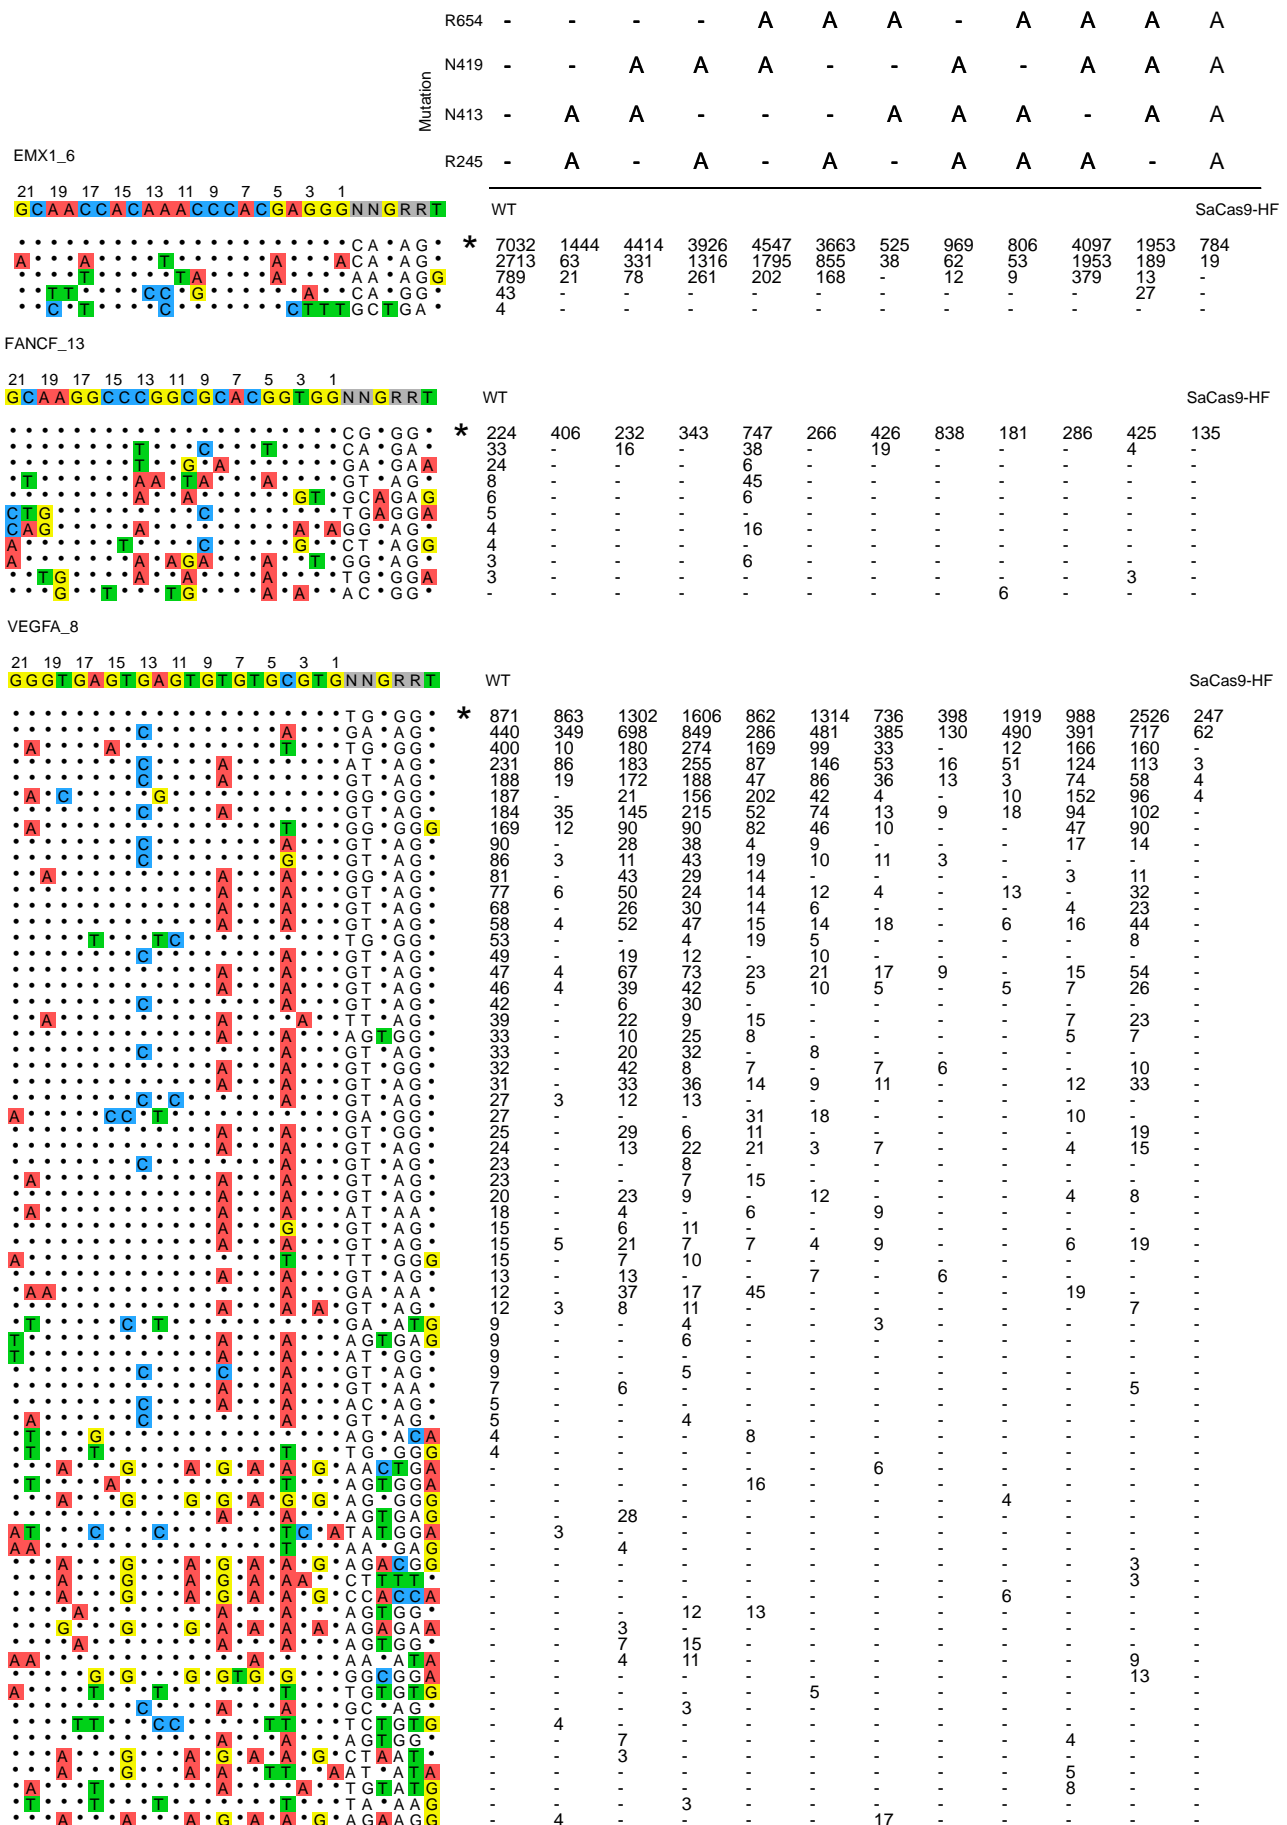

**Fig. S3. Epistasis effect of SaCas9 residues on targeting specificity.** Genome-wide cleavage of WT, double, triple, and quadruple mutant SaCas9s (mutation combination indicated in the top right panel) detected by GUIDE-seq at sites EMX1\_6, FANCF\_13 and VEGFA\_8. Read counts listed in the right represent the cleavage frequency at a given site; on target site is marked with \* for each sgRNA; mismatched positions are highlighted within the spacer or PAM.

| Target   | Sequence                                                                                                                                                                                                                                                                                         | GUIDE-seq reads |       |           | Targeted deep seq. InDel% |       |           |
|----------|--------------------------------------------------------------------------------------------------------------------------------------------------------------------------------------------------------------------------------------------------------------------------------------------------|-----------------|-------|-----------|---------------------------|-------|-----------|
|          |                                                                                                                                                                                                                                                                                                  | WT              | R245A | SaCas9-HF | WT                        | R245A | SaCas9-HF |
| FANCF_10 | 21 19 17 15 13 11 9 7 5 3 1<br>G T A G G G C C T T C G C G C A C C T C A N N G R R T                                                                                                                                                                                                             | 241             | 313   | 274       | 13.5                      | 10.1  | 8.6       |
| RUNX1_13 | 21 19 17 15 13 11 9 7 5 3 1<br>G A A A G A G A G A T G T A G G G C T A G N N G R R T                                                                                                                                                                                                             | 493             | 1179  | 1570      | 27.2                      | 34.8  | 34.8      |
|          | ..... A G • G G • *<br>..... G T • A A •                                                                                                                                                                                                                                                         | 3               | -     | -         | OT1 <0.1*                 | NT    | <0.1      |
| RUNX1_14 | 23 21 19 17 15 13 11 9 7 5 3 1<br>G T A C T C A C C T C T C A T G A A G C A C T N N G R R T                                                                                                                                                                                                      | 881             | 99    | 654       | 40.7                      | 40.5  | 36.6      |
| EMX1_6   | 21 19 17 15 13 11 9 7<br>G C A A C C A C A A A C C C A C G A G G G N N G R R T                                                                                                                                                                                                                   | 7032            | 4934  | 784       | 62.0                      | 56.4  | 19.5      |
|          | A • • • • • T • • • • • C A • A G • *<br>• • • • • T • • • • • C A • A G •<br>• • • • • T • • • • • A • • • • A C A • A G •<br>• • • • • T • • • • • A • • • • A A • A G G •<br>• • • • • C • • • • • C C • • • • • A • • • • C A • G G •<br>• • • • • C • T • • • • • C T • T T • G C • T G A • | 2713            | 1647  | 19        | OT1 5.0*                  | NT    | 0.3*      |
|          | • • • • • T • • • • • A • • • • • C A • A G •                                                                                                                                                                                                                                                    | 789             | 321   | -         | OT2 2.2*                  | NT    | <0.1      |
|          | • • • • • T • • • • • A • • • • • A • • • • • C A • G G •                                                                                                                                                                                                                                        | 43              | -     | -         | OT3 <0.1                  | NT    | <0.1      |
|          | • • • • • C • T • • • • • C T • T T • G C • T G A •                                                                                                                                                                                                                                              | 4               | -     | -         | OT4 <0.1*                 | NT    | <0.1      |
| VEGFA_8  | 21 19 17 15 13 11 9 7<br>G G G T G A G T G A G T G T G T G C G T G N N G R R T                                                                                                                                                                                                                   | 871             | 854   | 247       | 57.5                      | 54.5  | 50.9      |
|          | ..... T G • G G • *<br>..... G A • A G •                                                                                                                                                                                                                                                         | 440             | 259   | 62        | OT1 3.6*                  | NT    | 1.8*      |
|          | ..... T G • G G •                                                                                                                                                                                                                                                                                | 400             | 66    | -         | OT2 1.5*                  | NT    | <0.1      |
|          | ..... A T • A G •                                                                                                                                                                                                                                                                                | 231             | 94    | 3         | NT                        | NT    | NT        |
|          | ..... G T • A G •                                                                                                                                                                                                                                                                                | 188             | 64    | 4         | NT                        | NT    | NT        |
|          | ..... G G • G G •                                                                                                                                                                                                                                                                                | 187             | 54    | 4         | NT                        | NT    | NT        |
|          | ..... G T • A G •                                                                                                                                                                                                                                                                                | 184             | 45    | -         | OT4 3.6*                  | NT    | <0.1      |
|          | ..... G G • G G G •                                                                                                                                                                                                                                                                              | 169             | 45    | -         | NT                        | NT    | NT        |
|          | ..... G T • A G •                                                                                                                                                                                                                                                                                | 90              | 3     | -         | OT5 1.1*                  | NT    | <0.1      |
|          | ..... G T • A G •                                                                                                                                                                                                                                                                                | 86              | 11    | -         | NT                        | NT    | NT        |
|          | ..... G G • A G •                                                                                                                                                                                                                                                                                | 81              | -     | -         | NT                        | NT    | NT        |
|          | ..... G T • A G •                                                                                                                                                                                                                                                                                | 77              | 11    | -         | OT3 1.3*                  | NT    | <0.1      |
|          | ..... G T • A G •                                                                                                                                                                                                                                                                                | 68              | 5     | -         | NT                        | NT    | NT        |
|          | ..... G T • A G •                                                                                                                                                                                                                                                                                | 58              | 8     | -         | NT                        | NT    | NT        |
|          | ..... T G • G G •                                                                                                                                                                                                                                                                                | 53              | 3     | -         | NT                        | NT    | NT        |
|          | ..... G T • A G •                                                                                                                                                                                                                                                                                | 49              | 7     | -         | NT                        | NT    | NT        |
|          | ..... G T • A G •                                                                                                                                                                                                                                                                                | 47              | 13    | -         | NT                        | NT    | NT        |
|          | ..... G T • A G •                                                                                                                                                                                                                                                                                | 46              | 8     | -         | NT                        | NT    | NT        |
|          | ..... G T • A G •                                                                                                                                                                                                                                                                                | 42              | 4     | -         | NT                        | NT    | NT        |
|          | ..... T T • A G •                                                                                                                                                                                                                                                                                | 39              | 6     | -         | NT                        | NT    | NT        |
|          | ..... A G T • G G •                                                                                                                                                                                                                                                                              | 33              | -     | -         | NT                        | NT    | NT        |
|          | ..... G T • A G •                                                                                                                                                                                                                                                                                | 33              | 5     | -         | NT                        | NT    | NT        |
|          | ..... G T • G G •                                                                                                                                                                                                                                                                                | 32              | 3     | -         | NT                        | NT    | NT        |
|          | ..... G T • A G •                                                                                                                                                                                                                                                                                | 31              | -     | -         | NT                        | NT    | NT        |
|          | ..... G T • A G •                                                                                                                                                                                                                                                                                | 27              | 7     | -         | NT                        | NT    | NT        |
|          | ..... G A • G G •                                                                                                                                                                                                                                                                                | 27              | 9     | -         | NT                        | NT    | NT        |
|          | ..... G T • G G •                                                                                                                                                                                                                                                                                | 25              | 9     | -         | NT                        | NT    | NT        |
|          | ..... G T • A G •                                                                                                                                                                                                                                                                                | 24              | -     | -         | NT                        | NT    | NT        |
|          | ..... G T • A G •                                                                                                                                                                                                                                                                                | 23              | -     | -         | NT                        | NT    | NT        |
|          | ..... G T • A G •                                                                                                                                                                                                                                                                                | 23              | -     | -         | NT                        | NT    | NT        |
|          | ..... G T • A G •                                                                                                                                                                                                                                                                                | 20              | -     | -         | NT                        | NT    | NT        |
|          | ..... A T • A A •                                                                                                                                                                                                                                                                                | 18              | -     | -         | NT                        | NT    | NT        |
|          | ..... T T • G G G •                                                                                                                                                                                                                                                                              | 15              | -     | -         | NT                        | NT    | NT        |
|          | ..... G T • A G •                                                                                                                                                                                                                                                                                | 15              | -     | -         | NT                        | NT    | NT        |
|          | ..... G T • A G •                                                                                                                                                                                                                                                                                | 15              | -     | -         | NT                        | NT    | NT        |
|          | ..... G T • A G •                                                                                                                                                                                                                                                                                | 13              | -     | -         | NT                        | NT    | NT        |
|          | ..... G T • A G •                                                                                                                                                                                                                                                                                | 12              | -     | -         | NT                        | NT    | NT        |
|          | ..... G A • A A •                                                                                                                                                                                                                                                                                | 12              | -     | -         | NT                        | NT    | NT        |
|          | ..... G A • A T • G •                                                                                                                                                                                                                                                                            | 9               | 6     | -         | NT                        | NT    | NT        |
|          | ..... A G T • G A • G •                                                                                                                                                                                                                                                                          | 9               | -     | -         | NT                        | NT    | NT        |
|          | ..... G T • A G •                                                                                                                                                                                                                                                                                | 9               | -     | -         | NT                        | NT    | NT        |
|          | ..... A T • G G •                                                                                                                                                                                                                                                                                | 9               | -     | -         | NT                        | NT    | NT        |
|          | ..... G T • A A •                                                                                                                                                                                                                                                                                | 7               | -     | -         | OT10                      | NT    | NT        |
|          | ..... A C • A G •                                                                                                                                                                                                                                                                                | 5               | -     | -         | OT7 #                     | NT    | #         |
|          | ..... G T • A G •                                                                                                                                                                                                                                                                                | 5               | -     | -         | OT6 0.1*                  | NT    | <0.1      |
|          | ..... A G • A C • A •                                                                                                                                                                                                                                                                            | 4               | -     | -         | OT8 0.1*                  | NT    | <0.1      |
|          | ..... T G • G G • G •                                                                                                                                                                                                                                                                            | 4               | -     | -         | OT9 #                     | NT    | #         |

**Fig. S4: Genome-wide editing specificity of wild-type SaCas9, R245A and quadruple mutants at five target sites with canonical NNGRRT PAM.** GUIDE-seq reads and InDel% detected in targeted deep sequencing for the on-target and off-target sites (in dark blue) are listed on the right. On target site is indicated with “\*” at the right of the target sequence. Mismatched bases in off-target sites with the on-target site are highlighted. “NT” indicates off-target sites not subjected to targeted deep sequencing; “#” indicates off-target sites prone to false positives in targeted deep sequencing and percentages were not calculated; and InDel% marked with “\*” indicates edited reads confirmed by IGV visualization.



**a**

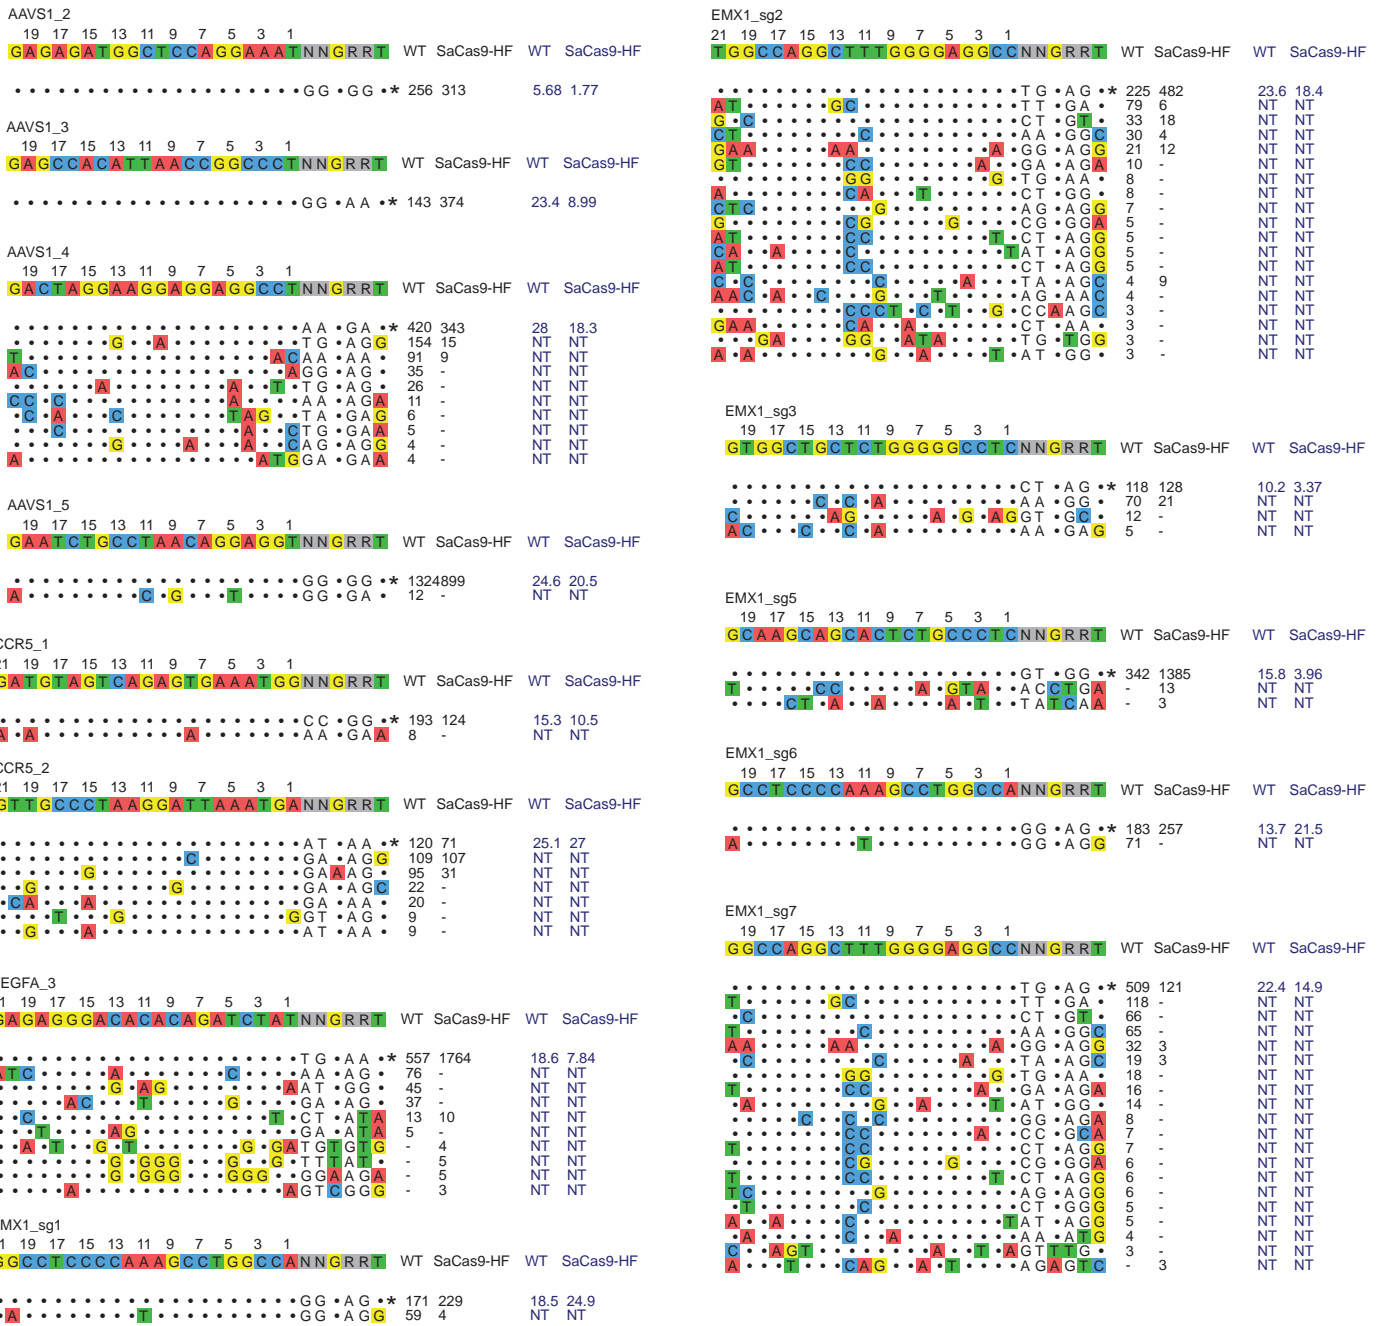

**b**

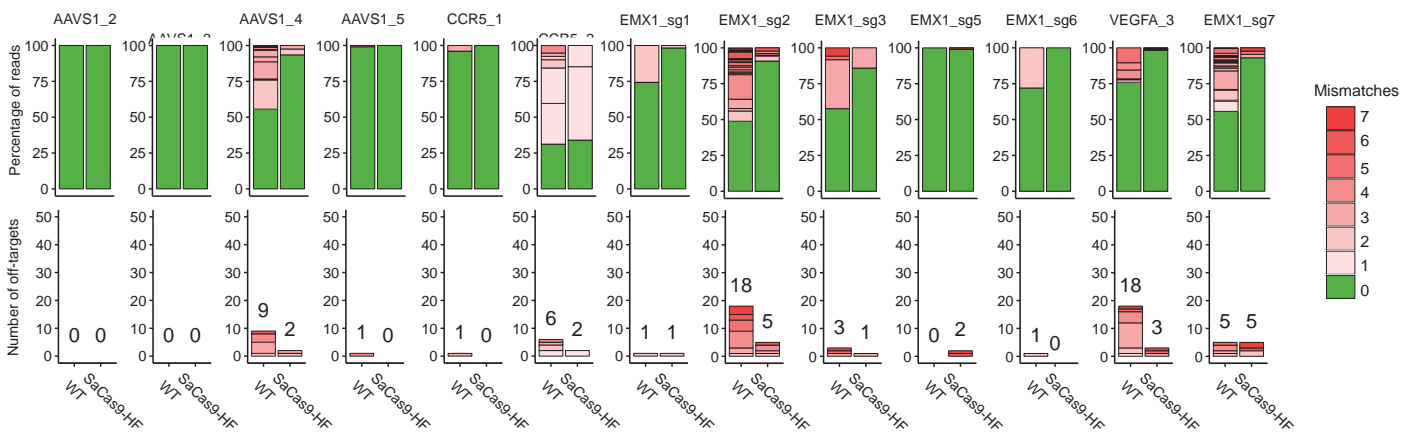

**Fig. S5: Genome-wide on- and off-target activities of wild-type SaCas9 and SaCas9-HF when targeting additional 13 human endogenous sites with canonical NNGRRT PAMs.**

**a**, Genome-wide cleavage sites detected by GUIDE-seq. On target site is indicated with ‘\*’ at the right of the target sequence. Mismatched bases in off-target sites with the on-target site are highlighted. InDel% detected in targeted deep sequencing for the on-target (in dark blue) are listed. **b**, Percentage of edited reads detected by GUIDE-seq at on-target site (green) and off-target sites (ordered by number of mismatches) among total edited reads (top) and summary of numbers of off-targets at 13 NNGRRT-PAM sites by WT-SaCas9 and SaCas9-HF (bottom).

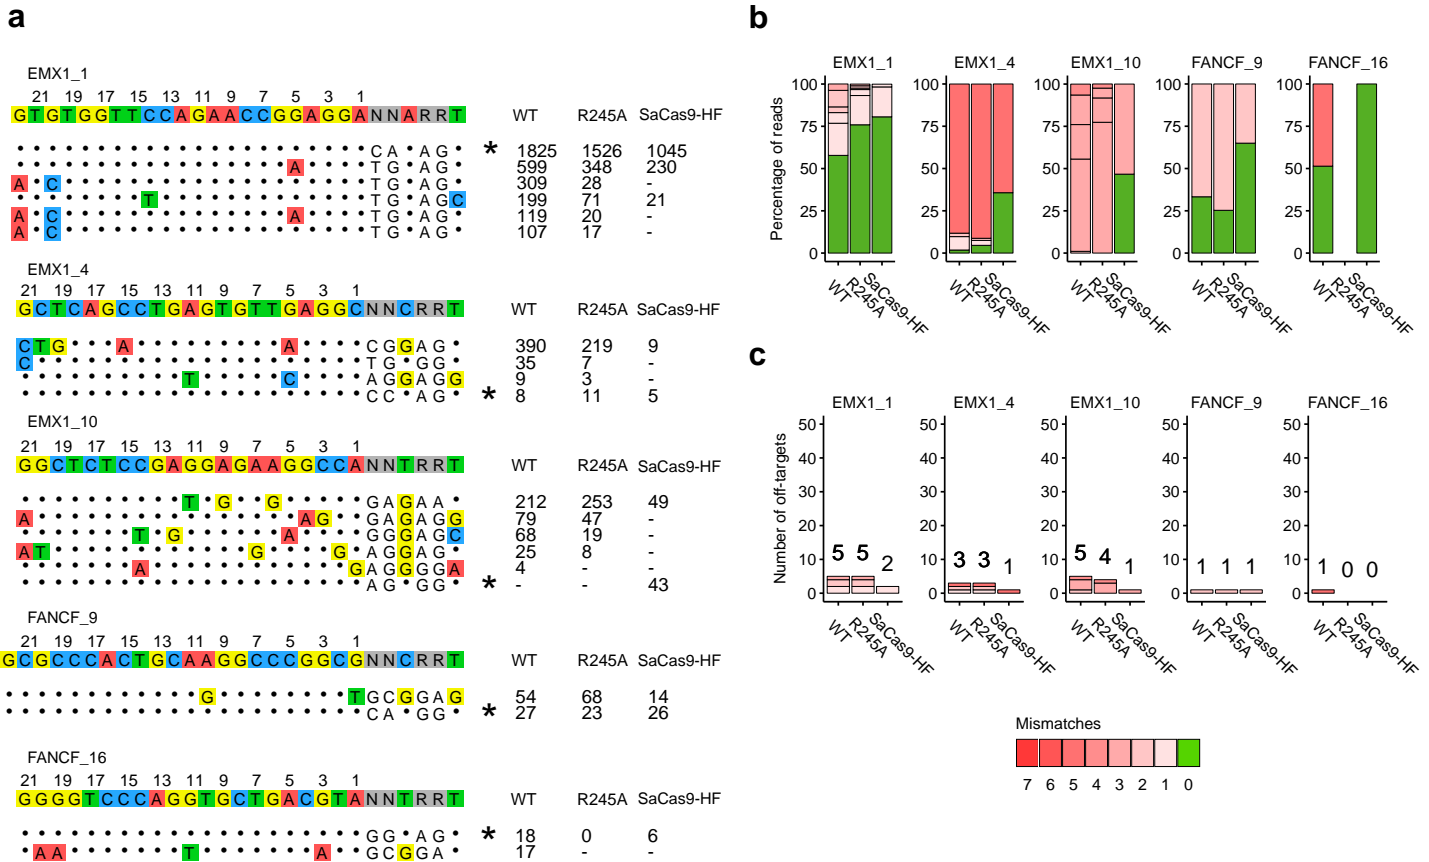

**Fig. S6: Genome-wide target profiles of WT-SaCas9, R245A and SaCas9-HF at non-canonical PAM sites.**

(a) GUIDE-seq of the non-NNGRRT sites EMX1-1, EMX1\_4, EMX1\_10, FANCF\_9 and FANCF\_16. Read counts listed in the right represent the cleavage frequency at a given site; on target site is marked with \* for each sgRNA; mismatched positions are highlighted within the spacer or PAM. (b) Summary bar chart of the genome-wide off-target detection of WT-SaCas9 (WT), SaCas9-R245A (R245A), SaCas9-HF (HF) at non-NNGRRT PAM sites: EMX1-1, EMX1\_4, EMX1\_10, FANCF\_9 and FANCF\_16. Each bar indicates the composition of dsODN integrated reads detected by GUIDE-seq for the SaCas9 variant; each stacked box shows the percentage of reads, as an approximation of cleavage frequency, at a target site with 0 (green) to 7 (red) mismatches. (c) A summary of the numbers of off-target sites.

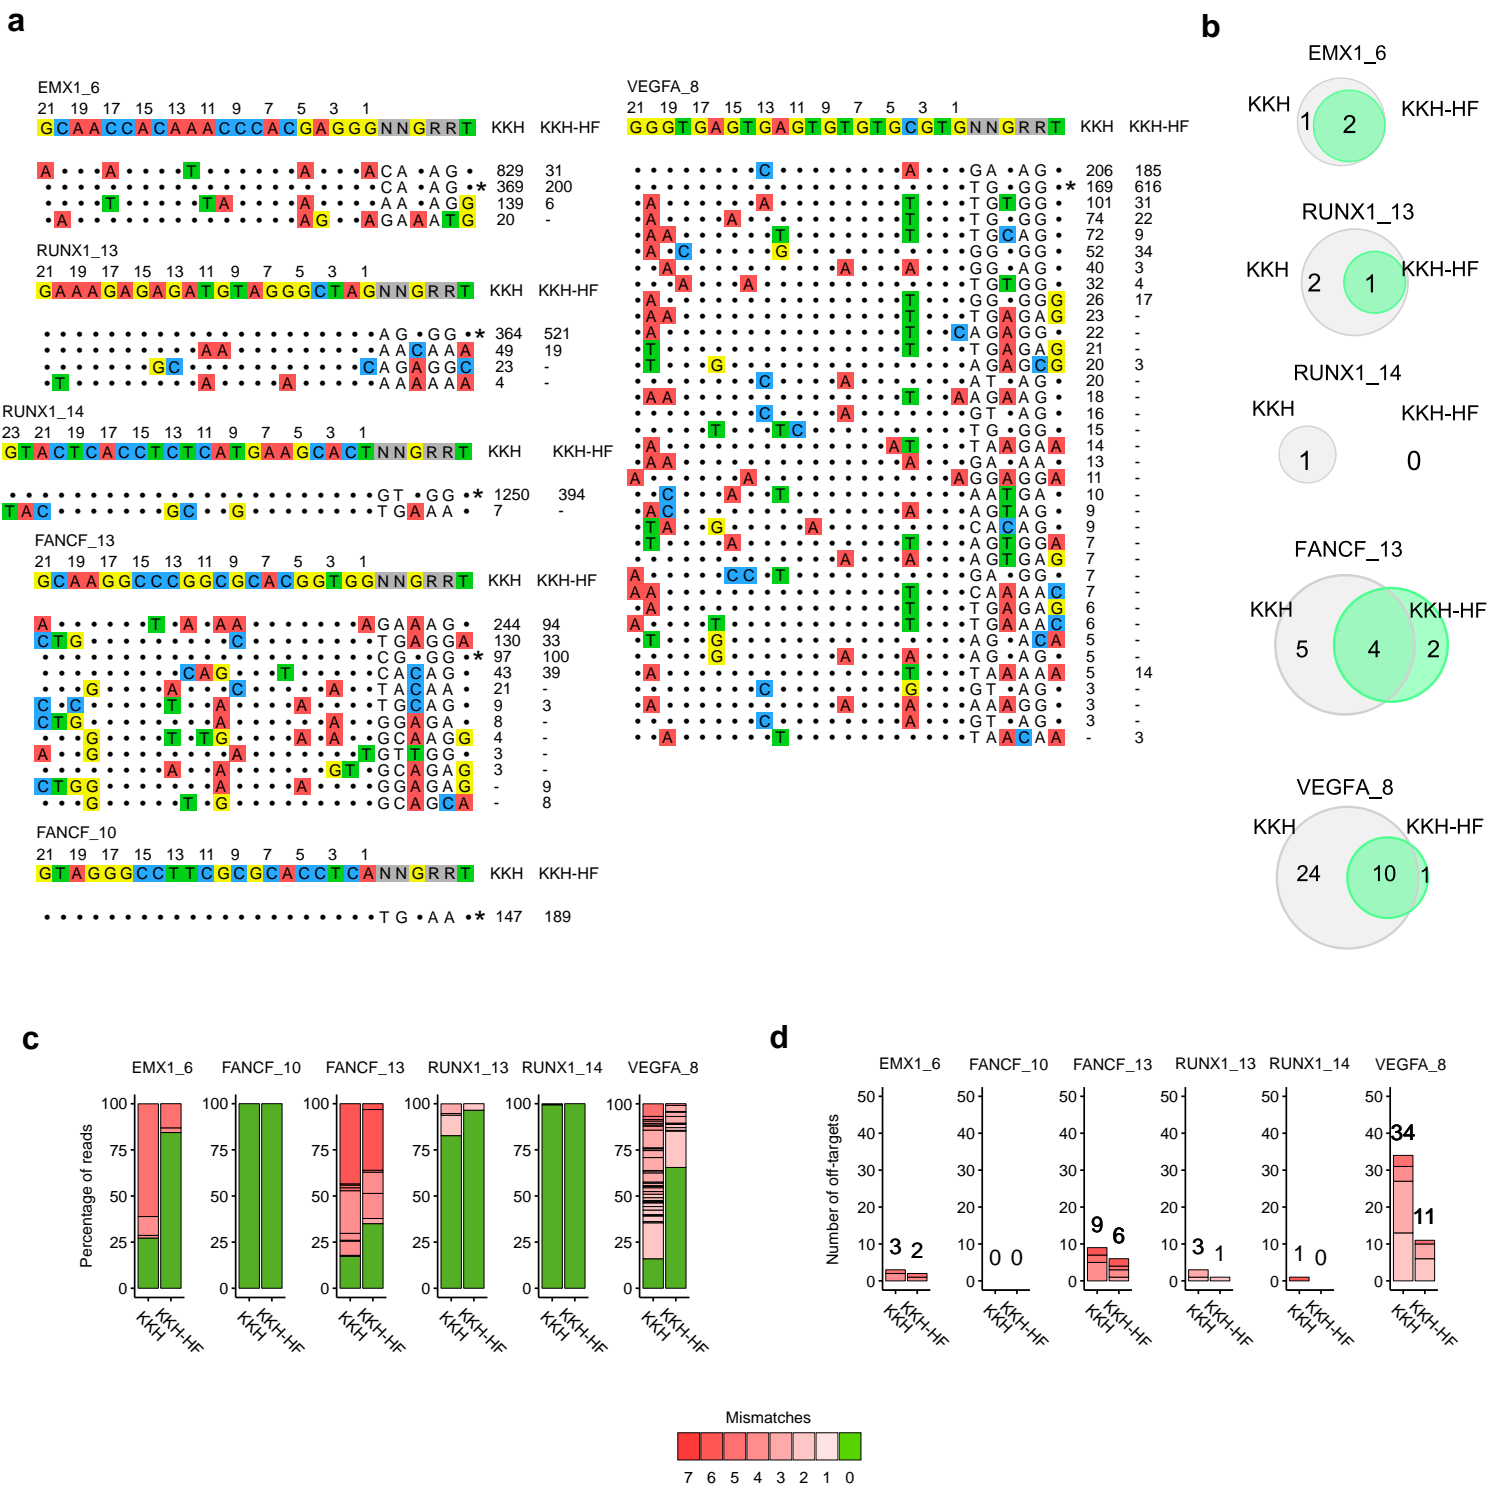

**Fig. S7. On and off-target cleavage by KKH and KKH-HF at 6 canonical PAM human endogenous sites.**  
**a**, GUIDE-seq detected cleavage sites by KKH-SaCas9 and KKH-HF. Read counts listed in the right represent number of GUIDE-seq reads. On-target site is indicated with '\*'. Mismatched bases in off-target sites with the on-target site are highlighted. **b**, Venn diagram comparing the number of off-target sites between KKH-SaCas9 and KKH-HF in (a). **c**, Percentage of edited reads detected by GUIDE-seq at on-target site (green) and off-target sites (ordered by number of mismatches). **d**, Number of off-target sites in (c).

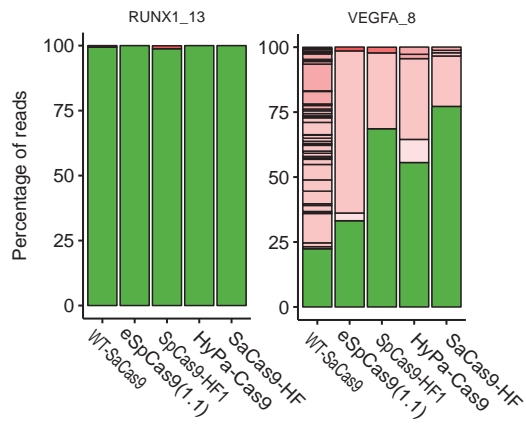

**Fig. S8: Performance comparison of high fidelity Sa- and Sp-Cas9 variants.**

Percentage of GUIDE-seq reads at on-target site (green) and off-target sites (ordered by number of mismatches) among total edited reads by each SaCas9 at each of the targeting site RUNX1\_13 and VEGFA\_8.

**Table S1. Expression plasmids of SaCas9 variants used in this study.**

| <b>Plasmid name</b> | <b>Mutation site</b>                               |
|---------------------|----------------------------------------------------|
| 135-WT (BPK2139)    | Wild-type SaCas9 without mutation.                 |
| 135-2507-3011       | R245A (2507 AG-GC), N413A (3011 AA-GC)             |
| 135-2507-3011-3029  | R245A, N413A, N419A (3029 AA-GC)                   |
| 135-2507-3011-3734  | R245A, N413A, R654A (3734 AG-GC)                   |
| 135-2507-3029       | R245A, N419A                                       |
| 135-2507-3029-3734  | R245A, N419A, R654A                                |
| 135-2507-3734       | R245A, R654A                                       |
| 135-3011-3029       | N413A, N419A                                       |
| 135-3011-3029-3734  | N413A, N419A, R654A                                |
| 135-3011-3734       | N413A, R654A                                       |
| 135-3029-3734       | N419A, R654A                                       |
| 135-2507            | R245A                                              |
| 135-3011            | N413A                                              |
| 135-3029            | N419A                                              |
| 135-3734            | R654A                                              |
| 135-HF              | R245A, N413A, N419A, R654A                         |
| 135-S-HF            | R499A, Q500A, R654A, G655A                         |
| 135-KKH             | G4118A, T4678A, G4818A                             |
| 135-HF-KKH          | R245A, N413A, N419A, R654A, G4118A, T4678A, G4818A |

**Table S2. Human endogenous sites targeted in this study.**

| Site     | Spacer length (nt) | Genome location          | Sequence of protospacer and PAM       |
|----------|--------------------|--------------------------|---------------------------------------|
| EMX1_1   | 22                 | chr2+ 73160922-73160943  | GTGTGGTTCCAGAACC GGAGGA <b>CAAAGT</b> |
| EMX1_4   | 21                 | chr2+ 73160833-73160859  | GCTCAGCCTGAGTGTGAGGC <b>CCCAGT</b>    |
| EMX1_6   | 21                 | chr2+ 73161089-73161109  | GCAACCACAAACCCACGAGGG <b>CAGAGT</b>   |
| EMX1_10  | 21                 | chr2- 73161274-73161300  | GGCTCTCCGAGGAGAAGGCCA <b>AGTGGT</b>   |
| FANCF_9  | 22                 | chr11+ 22647242-22647269 | GCGCCCACTGCAAGGCCCGGCG <b>CACGGT</b>  |
| FANCF_10 | 21                 | chr11- 22647350-22647376 | GTAGGGCCTTCGCGCACCTCA <b>TGGAA</b>    |
| FANCF_13 | 21                 | chr11+ 22647251-22647277 | GCAAGGCCCGGCGCACGGTGG <b>CGGGGT</b>   |
| FANCF_16 | 21                 | chr11+ 22647273-22647299 | GGGTCCCAGGTGCTGACGTA <b>GGTAGT</b>    |
| RUNX1_13 | 21                 | chr21- 36421296-36421322 | GAAAGAGAGATGTAGGGCTAG <b>AGGGGT</b>   |
| RUNX1_14 | 23                 | chr21+ 36421131-36421159 | GTACTCACCTCTCATGAAGCACT <b>GTGGGT</b> |
| VEGFA_8  | 21                 | chr6+ 43737453-43737473  | GGGTGAGTGAGTGTGTGCGCTG <b>TGGGGT</b>  |
| AAVS1-2  | 20                 | chr19+ 55626992-55627017 | GAGAGATGGCTCCAGGAAAT <b>TGGGGT</b>    |
| AAVS1-3  | 20                 | chr19+ 55627180-55627205 | GAGCCACATTAACCGGCCCT <b>GGGAAT</b>    |
| AAVS1-4  | 20                 | chr19+ 55627076-55627101 | GACTAGGAAGGAGGAGGCC <b>TAAAGAT</b>    |
| AAVS1-5  | 20                 | chr19+ 55627033-55627058 | GAATCTGCCCTAACAGGAGGT <b>GGGGGT</b>   |
| CCR5-1   | 21                 | chr3 - 46413348-46413374 | GATGTAGTCAGAGTGAAATGG <b>CCGGGT</b>   |
| CCR5-2   | 21                 | chr3 + 46413579-46413605 | GTTGCCCTAAGGATTAATGA <b>ATGAAT</b>    |
| VEGFA_3  | 21                 | chr6- 43737522-43737548  | GAGAGGGACACACAGATCTAT <b>TGGAA</b>    |
| EMX1-sg1 | 21                 | chr2 - 73161167-73161193 | GGCCTCCCCAAAGCCTGGCCA <b>GGGAGT</b>   |
| EMX1-sg2 | 21                 | chr2 + 73161173-73161199 | TGGCCAGGCTTTGGGGAGGCC <b>TGGAGT</b>   |
| EMX1-sg3 | 20                 | chr2 + 73160858-73160883 | GTGGCTGCTCTGGGGGCCTC <b>CTGAGT</b>    |
| EMX1-sg5 | 20                 | chr2- 73161099-73161124  | GCAAGCAGCACTCTGCCCTC <b>GTGGGT</b>    |
| EMX1-sg6 | 20                 | chr2- 73161167-73161192  | GCCTCCCCAAAGCCTGGCCA <b>GGGAGT</b>    |
| EMX1-sg7 | 20                 | chr2+ 73161174-73161199  | GGCCAGGCTTTGGGGAGGCC <b>TGGAGT</b>    |

+/- is the genomic orientation of sgRNA. PAM is highlighted in red.

**Table S3. Target sequence in the spacer length and 5' mismatched G experiments**

| <b>Site name</b>        | <b>Length (bp)</b> | <b>Sequence</b>                 |
|-------------------------|--------------------|---------------------------------|
| VEGFA-15-22             | 22                 | TGGGTGAGTGAGTGTGTGCGTG          |
| VEGFA-15-21             | 21                 | GGGTGAGTGAGTGTGTGCGTG           |
| VEGFA-15-20             | 20                 | GGTGAGTGAGTGTGTGCGTG            |
| VEGFA-15-19             | 19                 | GTGAGTGAGTGTGTGCGTG             |
| VEGFA-24-22             | 22                 | GGAGAGGGACACACAGATCTAT          |
| VEGFA-24-21             | 21                 | GAGAGGGACACACAGATCTAT           |
| VEGFA-24-20             | 20                 | AGAGGGACACACAGATCTAT            |
| VEGFA-24-19             | 19                 | GAGGGACACACAGATCTAT             |
| VEGFA-25-22             | 22                 | GCGTTGGAGCGGGGAGAAGGCC          |
| VEGFA-25-21             | 21                 | CGTTGGAGCGGGGAGAAGGCC           |
| VEGFA-25-20             | 20                 | GTTGGAGCGGGGAGAAGGCC            |
| VEGFA-25-19             | 19                 | TTGGAGCGGGGAGAAGGCC             |
| FANCF_13 (Mismatched G) |                    | (G)GGCAAGGCCCGGCGCACGGTGGCGGGGT |
| RUNX1_13 (Mismatched G) |                    | (G)GGAAAGAGAGATGTAGGGCTAGAGGGGT |
| FANCF_10 (Mismatched G) |                    | (G)GGTAGGGCCTTCGCGCACCTCATGGAAT |

**Table S4. Primers for targeted deep sequencing.**

| Primer name     | Sequence                                                  | Note |
|-----------------|-----------------------------------------------------------|------|
| <b>For PCR1</b> |                                                           |      |
| VEGFA_8.fwd     | TACACGACGCTCTCCGATCTTGGGTGAATGGAGCGAGCAG                  | a    |
| VEGFA_8.rev     | TCCTCTCTATGGGCAGTCGGTGATGAGTGACCCCTGGCCTTCTC              | a    |
| EMX1_1.fwd      | TACACGACGCTCTCCGATCTGGCCTCCTGAGTTTCTCATCT                 | a    |
| EMX1_1.rev      | TCCTCTCTATGGGCAGTCGGTGATGACTCAGGCCCTTCCTCCT               | a    |
| EMX1_4.fwd      | TACACGACGCTCTCCGATCTAGCCTCAGTCTTCCCATCAG                  | a    |
| EMX1_4.rev      | TCCTCTCTATGGGCAGTCGGTGATTGGAACCACACCTTCACCTG              | a    |
| EMX1_6.fwd      | TACACGACGCTCTCCGATCTTCGATGTCACCTCCAATGAC                  | a    |
| EMX1_6.rev      | TCCTCTCTATGGGCAGTCGGTGATAGTGGCCAGAGTCCAGCTT               | a    |
| EMX1_10.fwd     | TACACGACGCTCTCCGATCTAGACACGGAGAGCAGCTG                    | a    |
| EMX1_10.rev     | TCCTCTCTATGGGCAGTCGGTGATCCATTGACAGAGGGACAAGC              | a    |
| FANCF_9.fwd     | TACACGACGCTCTCCGATCTCAAAGCGCCGATGGATGTG                   | a    |
| FANCF_9.rev     | TCCTCTCTATGGGCAGTCGGTGATGCGGTCTCAAGCACTACCTA              | a    |
| FANCF_10.fwd    | TACACGACGCTCTCCGATCTATCAGTACGCAGAGAGTCCG                  | a    |
| FANCF_10.rev    | TCCTCTCTATGGGCAGTCGGTGATACGTAGGTAGTCTTGAGACC              | a    |
| FANCF_13.fwd    | TACACGACGCTCTCCGATCTCAAAGCGCCGATGGATGTG                   | a    |
| FANCF_13.rev    | TCCTCTCTATGGGCAGTCGGTGATGCGGTCTCAAGCACTACCTA              | a    |
| FANCF_16.fwd    | TACACGACGCTCTCCGATCTATGGATGTGGCGCAGGTAG                   | a    |
| FANCF_16.rev    | TCCTCTCTATGGGCAGTCGGTGATCATGGAATCCCTTCTGCAGC              | a    |
| RUNX1_13.fwd    | TACACGACGCTCTCCGATCTGAGTCCCAGAGGTATCCAGC                  | a    |
| RUNX1_13.rev    | TCCTCTCTATGGGCAGTCGGTGATTCTCTCTGAAAATGCACCCT              | a    |
| RUNX1_14.fwd    | TACACGACGCTCTCCGATCTCAAAGTGCATTTCATTACAGG                 | a    |
| RUNX1_14.rev    | TCCTCTCTATGGGCAGTCGGTGATGAGGGTGCATTTTCAGGAGG              | a    |
| VEGFA_8.OT1.fwd | TACACGACGCTCTCCGATCTGCTGTGCTATTGAGTGAAAAGT                | b    |
| VEGFA_8.OT1.rev | GTGACTGGAGTTCAGACGTGTGCTCTTCCGATCTCGCTTGAACACTGAACGT      | b    |
| VEGFA_8.OT2.fwd | TACACGACGCTCTCCGATCTGCTCATCTTCAAAGCAGAGG                  | b    |
| VEGFA_8.OT2.rev | GTGACTGGAGTTCAGACGTGTGCTCTTCCGATCTGGATGGGCATTTATTGGAAA    | b    |
| VEGFA_8.OT3.fwd | TACACGACGCTCTCCGATCTCAGCGTTTATATGATCTGGAGTAGA             | b    |
| VEGFA_8.OT3.rev | GTGACTGGAGTTCAGACGTGTGCTCTTCCGATCTAACCATGGAGGTACAGTAAAACC | b    |
| VEGFA_8.OT4.fwd | TACACGACGCTCTCCGATCTTTTTAAAAAGTTTGTGTACCCTGA              | b    |
| VEGFA_8.OT4.rev | GTGACTGGAGTTCAGACGTGTGCTCTTCCGATCTGGCACTCACCATGAACAG      | b    |
| VEGFA_8.OT5.fwd | TACACGACGCTCTCCGATCTGTGCTTGTGTACCTAAACGTATC               | b    |
| VEGFA_8.OT5.rev | GTGACTGGAGTTCAGACGTGTGCTCTTCCGATCTGATCCCCAAAAGTGCCTTCA    | b    |
| VEGFA_8.OT6.fwd | TACACGACGCTCTCCGATCTGCCATCCTAGCCATCGTAAA                  | b    |
| VEGFA_8.OT6.rev | GTGACTGGAGTTCAGACGTGTGCTCTTCCGATCTGTGGAGGGAACCTACCGTGA    | b    |
| VEGFA_8.OT7.fwd | TACACGACGCTCTCCGATCTCAGAAAAGCTGAGATTTATTATTGAAG           | b    |
| VEGFA_8.OT7.rev | GTGACTGGAGTTCAGACGTGTGCTCTTCCGATCTTATAAAGTGGCCGACCTGGA    | b    |
| VEGFA_8.OT8.fwd | TACACGACGCTCTCCGATCTGCGTATTACAGGGTGTGCAAT                 | b    |
| VEGFA_8.OT8.rev | GTGACTGGAGTTCAGACGTGTGCTCTTCCGATCTTCTGGGAATCTAATGTATGGCA  | b    |
| VEGFA_8.OT9.fwd | TACACGACGCTCTCCGATCTCCCGCTCCAACCTCAAATG                   | b    |
| VEGFA_8.OT9.rev | GTGACTGGAGTTCAGACGTGTGCTCTTCCGATCTCGCGGTATGTATGTGTGT      | b    |
| EMX1_6.OT1.fwd  | TACACGACGCTCTCCGATCTTCTCACACAAAAGCACATGT                  | b    |
| EMX1_6.OT1.rev  | GTGACTGGAGTTCAGACGTGTGCTCTTCCGATCTTGCTATACATGCGACTGGT     | b    |
| EMX1_6.OT2.fwd  | TACACGACGCTCTCCGATCTACAAAAACATAGTGCCTGCTCC                | b    |
| EMX1_6.OT2.rev  | GTGACTGGAGTTCAGACGTGTGCTCTTCCGATCTGGAGCTTCTGTCTTACCCT     | b    |
| EMX1_6.OT3.fwd  | TACACGACGCTCTCCGATCTCTCCCTCCTTCTTCCACAGG                  | b    |
| EMX1_6.OT3.rev  | GTGACTGGAGTTCAGACGTGTGCTCTTCCGATCTGGACAAAACCAACCTTTCCA    | b    |
| EMX1_6.OT4.fwd  | TACACGACGCTCTCCGATCTCATAGTGCACCTGTCCCTCA                  | b    |



|                   |                                                              |   |
|-------------------|--------------------------------------------------------------|---|
| EMX1_6.OT4.rev    | GTGACTGGAGTTCAGACGTGTGCTCTTCCGATCTCAGACTGAGGTGTTGTTGGC       | b |
| FANCF_13.OT1.fwd  | TACACGACGCTCTTCCGATCTGGTCAAAAAGATCTGGGGC                     | b |
| FANCF_13.OT1.rev  | GTGACTGGAGTTCAGACGTGTGCTCTTCCGATCTCAAGCGCATGTCCACATAAA       | b |
| FANCF_13.OT2.fwd  | TACACGACGCTCTTCCGATCTCAAACCTCAAAGGCTGCATCA                   | b |
| FANCF_13.OT2.rev  | GTGACTGGAGTTCAGACGTGTGCTCTTCCGATCTCATAGAGCCTCTCCTTCCCT       | b |
| FANCF_13.OT3.fwd  | TACACGACGCTCTTCCGATCTAACGAGAACCTTCATTTATGCCA                 | b |
| FANCF_13.OT3.rev  | GTGACTGGAGTTCAGACGTGTGCTCTTCCGATCTGACTAATTGACTACCCACTCACT    | b |
| FANCF_13.OT4.fwd  | TACACGACGCTCTTCCGATCTATGTGGGGCAGGTACAGAG                     | b |
| FANCF_13.OT4.rev  | GTGACTGGAGTTCAGACGTGTGCTCTTCCGATCTGGAATTGTGGTGTGTCTGCA       | b |
| FANCF_13.OT5.fwd  | TACACGACGCTCTTCCGATCTGAGCAGGATCTTCCAGCACCT                   | b |
| FANCF_13.OT5.rev  | GTGACTGGAGTTCAGACGTGTGCTCTTCCGATCTGAGTACCTCCTGAGCCGC         | b |
| FANCF_13.OT6.fwd  | TACACGACGCTCTTCCGATCTCCCGCTCCAGGTTGCGCTGA                    | b |
| FANCF_13.OT6.rev  | GTGACTGGAGTTCAGACGTGTGCTCTTCCGATCTCCGTCGGACCCTCCAAGTG        | b |
| FANCF_13.OT7.fwd  | TACACGACGCTCTTCCGATCTACCCTAGTGTGTGACCAC                      | b |
| FANCF_13.OT7.rev  | GTGACTGGAGTTCAGACGTGTGCTCTTCCGATCTTGGTACAGAGTCCAGGCAG        | b |
| FANCF_13.OT8.fwd  | TACACGACGCTCTTCCGATCTCGTGGAAAAGTGGCACCC                      | b |
| FANCF_13.OT8.rev  | GTGACTGGAGTTCAGACGTGTGCTCTTCCGATCTCGCCAAACCCAGGAATATTG       | b |
| FANCF_13.OT9.fwd  | TACACGACGCTCTTCCGATCTAAGCACAACCAAGGAGAGGG                    | b |
| FANCF_13.OT9.rev  | GTGACTGGAGTTCAGACGTGTGCTCTTCCGATCTCTTTCAGTCACCTCACCAGT       | b |
| FANCF_13.OT10.fwd | TACACGACGCTCTTCCGATCTTGGGGTTTCATGCTCTCTTCA                   | b |
| FANCF_13.OT10.rev | GTGACTGGAGTTCAGACGTGTGCTCTTCCGATCTTTCACCCTTTCATCTCTCC        | b |
| RUNX1_13.OT1.fwd  | TACACGACGCTCTTCCGATCTACTGGCTTGGATTCTCTTCTCA                  | b |
| RUNX1_13.OT1.rev  | GTGACTGGAGTTCAGACGTGTGCTCTTCCGATCTCAGGGCGTCAGATTGAAACC       | b |
| VEGFA_15.fwd      | TACACGACGCTCTTCCGATCTTGGGTGAATGGAGCAGCAG                     | b |
| VEGFA_15.rev      | TCCTCTCTATGGGCAGTCGGTGATGAGTGACCCCTGGCCTTCTC                 | b |
| VEGFA_24.fwd      | TACACGACGCTCTTCCGATCTGAGCCGTTCCCTCTTTGCTA                    | b |
| VEGFA_24.rev      | GTGACTGGAGTTCAGACGTGTGCTCTTCCGATCTAGAGTGAGGACGTGTGTGT        | b |
| VEGFA_25.fwd      | TACACGACGCTCTTCCGATCTGCAGCGTCTTCGAGAGTGAGG                   | b |
| VEGFA_25.rev      | GTGACTGGAGTTCAGACGTGTGCTCTTCCGATCTTGGGGAGAGGGACACACAGAT      | b |
| AAVS1_2.rev       | GTGACTGGAGTTCAGACGTGTGCTCTTCCGATCTTCTGGCTCCATCGTAAGCAAACCTTA | b |
| AAVS1_2.fwd       | TACACGACGCTCTTCCGATCTGGTCTAACCCACCTCTGTGA                    | b |
| AAVS1_3.rev       | GTGACTGGAGTTCAGACGTGTGCTCTTCCGATCTCACTGTGGGGTGGAGGGGACA      | b |
| AAVS1_3.fwd       | TACACGACGCTCTTCCGATCTGGATCCTGTGTCCCCGAGCTG                   | b |
| AAVS1_4.rev       | GTGACTGGAGTTCAGACGTGTGCTCTTCCGATCTACAGGAGTGGGGGTAGACC        | b |
| AAVS1_4.fwd       | TACACGACGCTCTTCCGATCTGCCACTAGGGACAGGATTGGTGACAG              | b |
| AAVS1_5.rev       | GTGACTGGAGTTCAGACGTGTGCTCTTCCGATCTCCAGAAATGGGGTGTGTCCAC      | b |
| AAVS1_5.fwd       | TACACGACGCTCTTCCGATCTAGGCCTCCTCCTCTCTAGTCTC                  | b |
| CCR5_1.rev        | GTGACTGGAGTTCAGACGTGTGCTCTTCCGATCTCATCTGTGGTGGCAGACGAAACATTT | b |
| CCR5_1.fwd        | TACACGACGCTCTTCCGATCTAGGCAAGACCATCAGATGTTTGGTGA              | b |
| CCR5_2.rev        | GTGACTGGAGTTCAGACGTGTGCTCTTCCGATCTCTGTGCTTCAAGTCTTGTCTGCAA   | b |
| CCR5_2.fwd        | TACACGACGCTCTTCCGATCTACATGCACTATGAGCAAGCCAGTAAT              | b |
| EMX1_sg1.rev      | GTGACTGGAGTTCAGACGTGTGCTCTTCCGATCTCGTGGGCCCAAGCTGGACTC       | b |
| EMX1_sg1.fwd      | TACACGACGCTCTTCCGATCTATGTCTTGTCCCTCTGTCAATGGC                | b |
| EMX1_sg2.rev      | GTGACTGGAGTTCAGACGTGTGCTCTTCCGATCTCGTGGGCCCAAGCTGGACTCT      | b |
| EMX1_sg2.fwd      | TACACGACGCTCTTCCGATCTGCCTCAGCCAGCCCATTCG                     | b |
| EMX1_sg3.rev      | GTGACTGGAGTTCAGACGTGTGCTCTTCCGATCTTCACTCTCCCATCAGGCTCTCAGCT  | b |
| EMX1_sg3.fwd      | TACACGACGCTCTTCCGATCTGGGAGGAGGGGCACAGATGA                    | b |
| EMX1_sg5.rev      | GTGACTGGAGTTCAGACGTGTGCTCTTCCGATCTGGCCAATGGGAGGACATCGATGT    | b |
| EMX1_sg5.fwd      | TACACGACGCTCTTCCGATCTTCCAGCTTGGGCCACGCA                      | b |
| EMX1_sg6.rev      | GTGACTGGAGTTCAGACGTGTGCTCTTCCGATCTCGTGGGCCCAAGCTGGACTC       | b |

|                 |                                                                                |   |
|-----------------|--------------------------------------------------------------------------------|---|
| EMX1_sg6.fwd    | TACACGACGCTCTCCGATCTATTGCTTGTCCTCTGTCAATGGC                                    | b |
| EMX1_sg7.rev    | GTGACTGGAGTTCAGACGTGTGCTCTCCGATCTCGTGGGCCCAAGCTGGACTC                          | b |
| EMX1_sg7.fwd    | TACACGACGCTCTCCGATCTATTGCTTGTCCTCTGTCAATGGC                                    | b |
| VEGFA_3.rev     | GTGACTGGAGTTCAGACGTGTGCTCTCCGATCTGGAGAAGGCCAGGGGTCAC                           | b |
| VEGFA_3.fwd     | TACACGACGCTCTCCGATCTGGCAGGGGAAGCCGGAGAG                                        | b |
|                 |                                                                                |   |
| <b>For PCR2</b> |                                                                                |   |
| MI.P501         | AATGATACGGCGACCACCGAGATCTACACTAGATCGCANNWNNWNNACACTCTTCCCTACACGACGCTCTCCGATC*T |   |
| MI.P502         | AATGATACGGCGACCACCGAGATCTACACTCTCTATNNWNNWNNACACTCTTCCCTACACGACGCTCTCCGATC*T   |   |
| MI.P503         | AATGATACGGCGACCACCGAGATCTACACTATCTCTNNWNNWNNACACTCTTCCCTACACGACGCTCTCCGATC*T   |   |
| MI.P504         | AATGATACGGCGACCACCGAGATCTACACAGAGTAGANNWNNWNNACACTCTTCCCTACACGACGCTCTCCGATC*T  |   |
| MI.P505         | AATGATACGGCGACCACCGAGATCTACACGTAAGGANNWNNWNNACACTCTTCCCTACACGACGCTCTCCGATC*T   |   |
| MI.P506         | AATGATACGGCGACCACCGAGATCTACACTGCATANNWNNWNNACACTCTTCCCTACACGACGCTCTCCGATC*T    |   |
| MI.P507         | AATGATACGGCGACCACCGAGATCTACACAAGGAGTANNWNNWNNACACTCTTCCCTACACGACGCTCTCCGATC*T  |   |
| MI.P508         | AATGATACGGCGACCACCGAGATCTACACTAAGCCTNNWNNWNNACACTCTTCCCTACACGACGCTCTCCGATC*T   |   |
| P7-I-1          | CAAGCAGAAGACGGCATAACGAGATTCGCCTTAGTGACTGGAGTTCAGACGTGT                         |   |
| P7-I-2          | CAAGCAGAAGACGGCATAACGAGATCTAGTACGGTGACTGGAGTTCAGACGTGT                         |   |
| P7-I-3          | CAAGCAGAAGACGGCATAACGAGATTTCTGCCTGTGACTGGAGTTCAGACGTGT                         |   |
| P7-I-4          | CAAGCAGAAGACGGCATAACGAGATGCTCAGGAGTGACTGGAGTTCAGACGTGT                         |   |
| P7-I-5          | CAAGCAGAAGACGGCATAACGAGATAGGAGTCCGTGACTGGAGTTCAGACGTGT                         |   |
| P7-I-6          | CAAGCAGAAGACGGCATAACGAGATCATGCCTAGTGACTGGAGTTCAGACGTGT                         |   |
| P7-I-7          | CAAGCAGAAGACGGCATAACGAGATGTAGAGAGTGACTGGAGTTCAGACGTGT                          |   |
| P7-I-8          | CAAGCAGAAGACGGCATAACGAGATCCTCTCTGGTGACTGGAGTTCAGACGTGT                         |   |
| P7-I-9          | CAAGCAGAAGACGGCATAACGAGATAGCGTAGCGTGACTGGAGTTCAGACGTGT                         |   |
| P7-I-10         | CAAGCAGAAGACGGCATAACGAGATCAGCCTCGGTGACTGGAGTTCAGACGTGT                         |   |
| P7-I-11         | CAAGCAGAAGACGGCATAACGAGATTGCCTCTGTGACTGGAGTTCAGACGTGT                          |   |
| P7-I-12         | CAAGCAGAAGACGGCATAACGAGATTCTCTACGTGACTGGAGTTCAGACGTGT                          |   |
| P7-I-13         | CAAGCAGAAGACGGCATAACGAGATAACTTACGTGACTGGAGTTCAGACGTGT                          |   |
| P7-I-14         | CAAGCAGAAGACGGCATAACGAGATTGGAGAGGGTGACTGGAGTTCAGACGTGT                         |   |
| P7-I-15         | CAAGCAGAAGACGGCATAACGAGATACGCATCGGTGACTGGAGTTCAGACGTGT                         |   |
| P7-I-16         | CAAGCAGAAGACGGCATAACGAGATGTACCGTTGTGACTGGAGTTCAGACGTGT                         |   |
| P7-I-17         | CAAGCAGAAGACGGCATAACGAGATTACAGTTAGTGACTGGAGTTCAGACGTGT                         |   |
| P7-I-18         | CAAGCAGAAGACGGCATAACGAGATAATCACTGTGACTGGAGTTCAGACGTGT                          |   |
| P7-I-19         | CAAGCAGAAGACGGCATAACGAGATGTACCTAGTGACTGGAGTTCAGACGTGT                          |   |
| P7-I-20         | CAAGCAGAAGACGGCATAACGAGATCTGGAACAGTGACTGGAGTTCAGACGTGT                         |   |
| P7-I-21         | CAAGCAGAAGACGGCATAACGAGATGGTGACTAGTGACTGGAGTTCAGACGTGT                         |   |
| P7-I-22         | CAAGCAGAAGACGGCATAACGAGATGTCAACCGTGACTGGAGTTCAGACGTGT                          |   |
| P7-I-23         | CAAGCAGAAGACGGCATAACGAGATGCCTGTCTGTGACTGGAGTTCAGACGTGT                         |   |
| P7-I-24         | CAAGCAGAAGACGGCATAACGAGATACTGATGGTGACTGGAGTTCAGACGTGT                          |   |
| P7-I-25         | CAAGCAGAAGACGGCATAACGAGATATGCTAACGTGACTGGAGTTCAGACGTGT                         |   |
| P7-I-26         | CAAGCAGAAGACGGCATAACGAGATCACTGAGTGTGACTGGAGTTCAGACGTGT                         |   |
| P7-I-27         | CAAGCAGAAGACGGCATAACGAGATTAGGCCATGTGACTGGAGTTCAGACGTGT                         |   |
| P7-I-28         | CAAGCAGAAGACGGCATAACGAGATCAGCAGTCGTGACTGGAGTTCAGACGTGT                         |   |
| P7-I-29         | CAAGCAGAAGACGGCATAACGAGATTTCTGAGAGTGACTGGAGTTCAGACGTGT                         |   |
| P7-I-30         | CAAGCAGAAGACGGCATAACGAGATGGACGTTAGTGACTGGAGTTCAGACGTGT                         |   |

|         |                                                          |  |
|---------|----------------------------------------------------------|--|
| P7-I-31 | CAAGCAGAAGACGGCATAACGAGATGTGTAGGTGTGACTGGAGTTCAGACGTGT   |  |
| P7-I-32 | CAAGCAGAAGACGGCATAACGAGATCATCTCAGGTGACTGGAGTTCAGACGTGT   |  |
| P7-I-33 | CAAGCAGAAGACGGCATAACGAGATGCATAGCAGTGTGACTGGAGTTCAGACGTGT |  |
| P7-I-34 | CAAGCAGAAGACGGCATAACGAGATCAGTGCACGTGACTGGAGTTCAGACGTGT   |  |
| P7-I-35 | CAAGCAGAAGACGGCATAACGAGATTTCCGGCATGTGACTGGAGTTCAGACGTGT  |  |
| P7-I-36 | CAAGCAGAAGACGGCATAACGAGATCAACAGGTGTGACTGGAGTTCAGACGTGT   |  |
| P7-I-37 | CAAGCAGAAGACGGCATAACGAGATAACACTCGGTGACTGGAGTTCAGACGTGT   |  |
| P7-I-38 | CAAGCAGAAGACGGCATAACGAGATGTCCTGACGTGACTGGAGTTCAGACGTGT   |  |
| P7-I-39 | CAAGCAGAAGACGGCATAACGAGATGACGTAGAGTGTGACTGGAGTTCAGACGTGT |  |
| P7-I-40 | CAAGCAGAAGACGGCATAACGAGATGATTGGCAGTGTGACTGGAGTTCAGACGTGT |  |
| P7-I-41 | CAAGCAGAAGACGGCATAACGAGATGCCACGACGTGACTGGAGTTCAGACGTGT   |  |
| P7-I-42 | CAAGCAGAAGACGGCATAACGAGATTTGTTACGGTGTGACTGGAGTTCAGACGTGT |  |
| P7-I-43 | CAAGCAGAAGACGGCATAACGAGATACGACCTAGTGTGACTGGAGTTCAGACGTGT |  |
| P7-I-44 | CAAGCAGAAGACGGCATAACGAGATTGATAATGGTGTGACTGGAGTTCAGACGTGT |  |
| P7-I-45 | CAAGCAGAAGACGGCATAACGAGATGGTTCATGTGACTGGAGTTCAGACGTGT    |  |
| P7-I-46 | CAAGCAGAAGACGGCATAACGAGATCCAGTATCGTGTGACTGGAGTTCAGACGTGT |  |
| P7-I-47 | CAAGCAGAAGACGGCATAACGAGATGTCCAGCTGTGACTGGAGTTCAGACGTGT   |  |
| P7-I-48 | CAAGCAGAAGACGGCATAACGAGATTAACCTTCGTGACTGGAGTTCAGACGTGT   |  |
| P7-I-49 | CAAGCAGAAGACGGCATAACGAGATATAGGCTGGTGTGACTGGAGTTCAGACGTGT |  |
| P7-I-50 | CAAGCAGAAGACGGCATAACGAGATCCACTTGAGTGTGACTGGAGTTCAGACGTGT |  |
| P7-I-51 | CAAGCAGAAGACGGCATAACGAGATTGGACCACGTGACTGGAGTTCAGACGTGT   |  |
| P7-I-52 | CAAGCAGAAGACGGCATAACGAGATTGCGTCAAGTGTGACTGGAGTTCAGACGTGT |  |
| P7-I-53 | CAAGCAGAAGACGGCATAACGAGATGTCGTGTAGTGTGACTGGAGTTCAGACGTGT |  |
| P7-I-54 | CAAGCAGAAGACGGCATAACGAGATGGAGGCCAGTGTGACTGGAGTTCAGACGTGT |  |
| P7-I-55 | CAAGCAGAAGACGGCATAACGAGATCTAGCCTGGTGTGACTGGAGTTCAGACGTGT |  |
| P7-I-56 | CAAGCAGAAGACGGCATAACGAGATGCGCGTGTGTGACTGGAGTTCAGACGTGT   |  |
| P7-I-57 | CAAGCAGAAGACGGCATAACGAGATCATTATGGGTGTGACTGGAGTTCAGACGTGT |  |
| P7-I-58 | CAAGCAGAAGACGGCATAACGAGATATTATACGGTGTGACTGGAGTTCAGACGTGT |  |
| P7-I-59 | CAAGCAGAAGACGGCATAACGAGATTTAGACTCGTGTGACTGGAGTTCAGACGTGT |  |
| P7-I-60 | CAAGCAGAAGACGGCATAACGAGATGTACGCACGTGACTGGAGTTCAGACGTGT   |  |
| P7-I-61 | CAAGCAGAAGACGGCATAACGAGATGAGCCATCGTGTGACTGGAGTTCAGACGTGT |  |
| P7-I-62 | CAAGCAGAAGACGGCATAACGAGATGTGGAGTTCGTGACTGGAGTTCAGACGTGT  |  |
| P7-I-63 | CAAGCAGAAGACGGCATAACGAGATCAGCTTCGGTGTGACTGGAGTTCAGACGTGT |  |
| P7-I-64 | CAAGCAGAAGACGGCATAACGAGATCACAAGTAGTGTGACTGGAGTTCAGACGTGT |  |
| P7-I-65 | CAAGCAGAAGACGGCATAACGAGATGATGTGGTGTGACTGGAGTTCAGACGTGT   |  |
| P7-I-66 | CAAGCAGAAGACGGCATAACGAGATCTTGGAGGGTGTGACTGGAGTTCAGACGTGT |  |
| P7-I-67 | CAAGCAGAAGACGGCATAACGAGATCGAACGTCGTGACTGGAGTTCAGACGTGT   |  |
| P7-I-68 | CAAGCAGAAGACGGCATAACGAGATATTGTCAAGTGTGACTGGAGTTCAGACGTGT |  |
| P7-I-69 | CAAGCAGAAGACGGCATAACGAGATGTTCCGGAGTGTGACTGGAGTTCAGACGTGT |  |
| P7-I-70 | CAAGCAGAAGACGGCATAACGAGATCCTAACGGGTGTGACTGGAGTTCAGACGTGT |  |
| P7-I-71 | CAAGCAGAAGACGGCATAACGAGATATCTGGACGTGACTGGAGTTCAGACGTGT   |  |
| P7-I-72 | CAAGCAGAAGACGGCATAACGAGATCTATAGACGTGACTGGAGTTCAGACGTGT   |  |
| P7-I-73 | CAAGCAGAAGACGGCATAACGAGATCTTGGCGGTGTGACTGGAGTTCAGACGTGT  |  |

|         |                                                         |  |
|---------|---------------------------------------------------------|--|
| P7-I-74 | CAAGCAGAAGACGGCATAACGAGATAATTAGGCGTGACTGGAGTTCAGACGTGT  |  |
| P7-I-75 | CAAGCAGAAGACGGCATAACGAGATCGTGTAGTGTGACTGGAGTTCAGACGTGT  |  |
| P7-I-76 | CAAGCAGAAGACGGCATAACGAGATTGCCAACAGTGACTGGAGTTCAGACGTGT  |  |
| P7-I-77 | CAAGCAGAAGACGGCATAACGAGATTACACAAGGTGACTGGAGTTCAGACGTGT  |  |
| P7-I-78 | CAAGCAGAAGACGGCATAACGAGATTAAGTAGGGTGACTGGAGTTCAGACGTGT  |  |
| P7-I-79 | CAAGCAGAAGACGGCATAACGAGATATAGTGTGTGACTGGAGTTCAGACGTGT   |  |
| P7-I-80 | CAAGCAGAAGACGGCATAACGAGATATGTAATAGTGACTGGAGTTCAGACGTGT  |  |
| P7-I-81 | CAAGCAGAAGACGGCATAACGAGATACTTGGTGGTGACTGGAGTTCAGACGTGT  |  |
| P7-I-82 | CAAGCAGAAGACGGCATAACGAGATCAGTCTAGGTGACTGGAGTTCAGACGTGT  |  |
| P7-I-83 | CAAGCAGAAGACGGCATAACGAGATTGACGCCCTGTGACTGGAGTTCAGACGTGT |  |
| P7-I-84 | CAAGCAGAAGACGGCATAACGAGATACCATGTAGTGACTGGAGTTCAGACGTGT  |  |
| P7-I-85 | CAAGCAGAAGACGGCATAACGAGATTTACCGACGTGACTGGAGTTCAGACGTGT  |  |
| P7-I-86 | CAAGCAGAAGACGGCATAACGAGATCCAGAAGTGACTGGAGTTCAGACGTGT    |  |
| P7-I-87 | CAAGCAGAAGACGGCATAACGAGATAGGTTGCTGTGACTGGAGTTCAGACGTGT  |  |
| P7-I-88 | CAAGCAGAAGACGGCATAACGAGATCTGAGTGAGTGACTGGAGTTCAGACGTGT  |  |
| P7-I-89 | CAAGCAGAAGACGGCATAACGAGATGGTACTGTGTGACTGGAGTTCAGACGTGT  |  |
| P7-I-90 | CAAGCAGAAGACGGCATAACGAGATTTGGTGCCGTGACTGGAGTTCAGACGTGT  |  |
| P7-I-91 | CAAGCAGAAGACGGCATAACGAGATTTCCGATGGTGACTGGAGTTCAGACGTGT  |  |
| P7-I-92 | CAAGCAGAAGACGGCATAACGAGATCCGTATATGTGACTGGAGTTCAGACGTGT  |  |
| P7-I-93 | CAAGCAGAAGACGGCATAACGAGATTATCGACAGTGACTGGAGTTCAGACGTGT  |  |
| P7-I-94 | CAAGCAGAAGACGGCATAACGAGATATAGCCGAGTGACTGGAGTTCAGACGTGT  |  |
| P7-I-95 | CAAGCAGAAGACGGCATAACGAGATGATCGGTTGTGACTGGAGTTCAGACGTGT  |  |
| P7-I-96 | CAAGCAGAAGACGGCATAACGAGATAATGGTTCGTGACTGGAGTTCAGACGTGT  |  |

a. PCR2: use one of the MIP.5##s and one of the P7##s (list in Table S5). Requires custom sequencing primers Index 1 and Read2 (list in Table S5).

b. PCR2: use one of the MIP.5##s and one of the P7-I-##s in PCR2. Compatible with standard Illumina sequencing primers.

\* Indicates a phosphorothioate bond modification.

**Table S5. Adaptor and primer sequences for GUIDE-seq.**

Note: Each adaptor is formed by using one TOP and one corresponding BOT oligos, with the following annealing program: 95°C for 1 min; slow ramping down at -0.2°C/sec to 4°C.

| TOP.ID | TOP.oligo.seq                             | BOT.ID | BOT.oligo.seq               |
|--------|-------------------------------------------|--------|-----------------------------|
| TOP001 | TACACGACGCTCTCCGATCTNNWNNWNATGCCANTGCCGTT | BOT001 | /5Phos/ACGGCANTGGCAT/3Phos/ |
| TOP002 | TACACGACGCTCTCCGATCTNNWNNWNACCATCNCAACGAT | BOT002 | /5Phos/TCGTTGNATGGT/3Phos/  |
| TOP003 | TACACGACGCTCTCCGATCTNNWNNWNGTGGCCNACTACT  | BOT003 | /5Phos/GTAGTANGGCCAC/3Phos/ |
| TOP004 | TACACGACGCTCTCCGATCTNNWNNWNGGAGTTNGAGGTGT | BOT004 | /5Phos/CACCTCNACTCC/3Phos/  |
| TOP005 | TACACGACGCTCTCCGATCTNNWNNWNATTGCANAGCAACT | BOT005 | /5Phos/GTTGCTNTGCAAT/3Phos/ |
| TOP006 | TACACGACGCTCTCCGATCTNNWNNWNATAACNCGAGTAT  | BOT006 | /5Phos/TACTCGNNTGTA/3Phos/  |
| TOP007 | TACACGACGCTCTCCGATCTNNWNNWNTGCGTTNCTAGCGT | BOT007 | /5Phos/CGCTAGNAACGCA/3Phos/ |
| TOP008 | TACACGACGCTCTCCGATCTNNWNNWNTGTCNCNTCTCACT | BOT008 | /5Phos/GTGAGANGGAACA/3Phos/ |
| TOP009 | TACACGACGCTCTCCGATCTNNWNNWNTGACATNCCTCGAT | BOT009 | /5Phos/GGCAGTNGTATCG/3Phos/ |
| TOP010 | TACACGACGCTCTCCGATCTNNWNNWNGATACNACTGCCT  | BOT010 | /5Phos/GGAGTNGTATCG/3Phos/  |
| TOP011 | TACACGACGCTCTCCGATCTNNWNNWNTCTGCGNAGTCTGT | BOT011 | /5Phos/CAGACTNCGAGA/3Phos/  |
| TOP012 | TACACGACGCTCTCCGATCTNNWNNWNTCTGCGNAGTCTGT | BOT012 | /5Phos/GACTCCNGAAGA/3Phos/  |
| TOP013 | TACACGACGCTCTCCGATCTNNWNNWAGGCTTACGTGTT   | BOT013 | /5Phos/ACACGTNAAGCT/3Phos/  |
| TOP014 | TACACGACGCTCTCCGATCTNNWNNWNTCAGANGTCACAT  | BOT014 | /5Phos/TGTGACNCTGTA/3Phos/  |
| TOP015 | TACACGACGCTCTCCGATCTNNWNNWAGCCGNGAGATAT   | BOT015 | /5Phos/TACTCTNCCGGT/3Phos/  |
| TOP016 | TACACGACGCTCTCCGATCTNNWNNWNATGGAANGTGGCT  | BOT016 | /5Phos/GCCACNTTCCAT/3Phos/  |
| TOP017 | TACACGACGCTCTCCGATCTNNWNNWAGACACNAATGTT   | BOT017 | /5Phos/ACATTGNGTGTCT/3Phos/ |
| TOP018 | TACACGACGCTCTCCGATCTNNWNNWNGGATGNTCATAGT  | BOT018 | /5Phos/CTATGANACTACC/3Phos/ |
| TOP019 | TACACGACGCTCTCCGATCTNNWNNWNATCGAGNGATCTAT | BOT019 | /5Phos/TAGATCNCTCGAT/3Phos/ |
| TOP020 | TACACGACGCTCTCCGATCTNNWNNWNCAACAANTGCCAAT | BOT020 | /5Phos/TTGGCANTTGTG/3Phos/  |
| TOP021 | TACACGACGCTCTCCGATCTNNWNNWNGTGAANCCAATCT  | BOT021 | /5Phos/GATTGGNTGCAC/3Phos/  |
| TOP022 | TACACGACGCTCTCCGATCTNNWNNWNACAATGNTCACAGT | BOT022 | /5Phos/CTGTGANCATTGT/3Phos/ |
| TOP023 | TACACGACGCTCTCCGATCTNNWNNWNGGCTCTNAACGTAT | BOT023 | /5Phos/TACGTTNAGAGCC/3Phos/ |
| TOP024 | TACACGACGCTCTCCGATCTNNWNNWNTCCACNATCCTT   | BOT024 | /5Phos/AGGAATNGTGGC/3Phos/  |
| TOP025 | TACACGACGCTCTCCGATCTNNWNNWNAAGCGNCTCCTT   | BOT025 | /5Phos/AAGGAGNCGCCTT/3Phos/ |
| TOP026 | TACACGACGCTCTCCGATCTNNWNNWNGAGACANGTGGAAT | BOT026 | /5Phos/TTCCACNTGTCT/3Phos/  |
| TOP027 | TACACGACGCTCTCCGATCTNNWNNWNATGCGTNAATGCAT | BOT027 | /5Phos/TGCATTNACGCAT/3Phos/ |
| TOP028 | TACACGACGCTCTCCGATCTNNWNNWNATAAGNTGGTCCT  | BOT028 | /5Phos/GGACCANCTTGA/3Phos/  |
| TOP029 | TACACGACGCTCTCCGATCTNNWNNWNACTCTNTGTGTTT  | BOT029 | /5Phos/AACACANAGGAGT/3Phos/ |
| TOP030 | TACACGACGCTCTCCGATCTNNWNNWNGGAGCNCCTGTCT  | BOT030 | /5Phos/GACAAGNGCTCCA/3Phos/ |
| TOP031 | TACACGACGCTCTCCGATCTNNWNNWNCAACTGNTCAGACT | BOT031 | /5Phos/GTCTGANCAGTTG/3Phos/ |
| TOP032 | TACACGACGCTCTCCGATCTNNWNNWNTCAGATNACCAGCT | BOT032 | /5Phos/GCTGGTNATCTGA/3Phos/ |
| TOP033 | TACACGACGCTCTCCGATCTNNWNNWNTGGCCGNTACTGT  | BOT033 | /5Phos/CAGTAANCGGCCA/3Phos/ |
| TOP034 | TACACGACGCTCTCCGATCTNNWNNWNGGCTCTNAATCACT | BOT034 | /5Phos/GTGATTNAGCACC/3Phos/ |
| TOP035 | TACACGACGCTCTCCGATCTNNWNNWNCATACGNATACAGT | BOT035 | /5Phos/CTGTATNCGTATG/3Phos/ |
| TOP036 | TACACGACGCTCTCCGATCTNNWNNWNTGAATANCTGGCT  | BOT036 | /5Phos/GCCAGGNTATCA/3Phos/  |
| TOP037 | TACACGACGCTCTCCGATCTNNWNNWNGTGGTCNATCGTAT | BOT037 | /5Phos/TACGATNGACCAC/3Phos/ |
| TOP038 | TACACGACGCTCTCCGATCTNNWNNWNGAACCTNATGACAT | BOT038 | /5Phos/TGTCATNAGGTTT/3Phos/ |
| TOP039 | TACACGACGCTCTCCGATCTNNWNNWNACGANCTATAGT   | BOT039 | /5Phos/CTATAGNTCGTGT/3Phos/ |
| TOP040 | TACACGACGCTCTCCGATCTNNWNNWNATGTCNGAGACTT  | BOT040 | /5Phos/AGTCTCNGCATAT/3Phos/ |
| TOP041 | TACACGACGCTCTCCGATCTNNWNNWNCCTTANGTGTGT   | BOT041 | /5Phos/CAGCACNTAAGCG/3Phos/ |
| TOP042 | TACACGACGCTCTCCGATCTNNWNNWNACTACTNAGGATT  | BOT042 | /5Phos/ATCCTCAGTAGT/3Phos/  |
| TOP043 | TACACGACGCTCTCCGATCTNNWNNWNGCTCCGNACCATAT | BOT043 | /5Phos/TATGGTNCGGAGC/3Phos/ |
| TOP044 | TACACGACGCTCTCCGATCTNNWNNWNTTCCGCNATAGTGT | BOT044 | /5Phos/CACTATNGCCGAA/3Phos/ |
| TOP045 | TACACGACGCTCTCCGATCTNNWNNWNTTAGAGNCCATGCT | BOT045 | /5Phos/GCATGGNCTTAA/3Phos/  |
| TOP046 | TACACGACGCTCTCCGATCTNNWNNWAGGTGANGTCTAT   | BOT046 | /5Phos/TAGAANTCACCT/3Phos/  |
| TOP047 | TACACGACGCTCTCCGATCTNNWNNWNAACATTNGCAGGTT | BOT047 | /5Phos/ACCTGCNAATGTT/3Phos/ |
| TOP048 | TACACGACGCTCTCCGATCTNNWNNWNGTGGCNATGGAAT  | BOT048 | /5Phos/TTCCATNGCCACC/3Phos/ |

**Primers used in enrichment PCR1 and PCR2**

| Primer | sequence | Note |
|--------|----------|------|
|--------|----------|------|

|            |                                                                     |          |
|------------|---------------------------------------------------------------------|----------|
| OFF_GSP1_- | GGATCTCGACGCTCTCCCTGTTTAAATTGAGTTGTCATATGTTAATAAC                   | for PCR1 |
| OFF_GSP1_+ | GGATCTCGACGCTCTCCCTATACCGTTATTAACATATGACA                           | for PCR1 |
| OFF_GSP2_- | CCTCTCTATGGGCAGTCGGTGATACATATGACAACTCAATTAAAC                       | for PCR2 |
| OFF_GSP2_+ | CCTCTCTATGGGCAGTCGGTGATTTGAGTTGTCATATGTTAATAACGGTA                  | for PCR2 |
| P558       | AATGATACGGCGACCACCGAGATCTACACTCTTTCCCTACACGACGCTCTTCCGATCT          | for PCR2 |
| P701       | CAAGCAGAAGACGGCATAACGAGATTTCGCTTAGTGACTGGAGTCTCTCTATGGGCAGTCGGTGA   | for PCR2 |
| P702       | CAAGCAGAAGACGGCATAACGAGATCTAGTACGGTGACTGGAGTCTCTCTATGGGCAGTCGGTGA   |          |
| P703       | CAAGCAGAAGACGGCATAACGAGATTTCTGCCTGTGACTGGAGTCTCTCTATGGGCAGTCGGTGA   |          |
| P704       | CAAGCAGAAGACGGCATAACGAGATGCTCAGGAGTGACTGGAGTCTCTCTATGGGCAGTCGGTGA   |          |
| P705       | CAAGCAGAAGACGGCATAACGAGATAGGAGTCCGTGACTGGAGTCTCTCTATGGGCAGTCGGTGA   |          |
| P706       | CAAGCAGAAGACGGCATAACGAGATCAGCCTAGTGACTGGAGTCTCTCTATGGGCAGTCGGTGA    |          |
| P707       | CAAGCAGAAGACGGCATAACGAGATGTAGAGAGGTGACTGGAGTCTCTCTATGGGCAGTCGGTGA   |          |
| P708       | CAAGCAGAAGACGGCATAACGAGATCCTCTCTGGTGACTGGAGTCTCTCTATGGGCAGTCGGTGA   |          |
| P709       | CAAGCAGAAGACGGCATAACGAGATAGCGTAGCGTGACTGGAGTCTCTCTATGGGCAGTCGGTGA   |          |
| P710       | CAAGCAGAAGACGGCATAACGAGATCAGCCTCGGTGACTGGAGTCTCTCTATGGGCAGTCGGTGA   |          |
| P711       | CAAGCAGAAGACGGCATAACGAGATTGCCCTTGTGACTGGAGTCTCTCTATGGGCAGTCGGTGA    |          |
| P712       | CAAGCAGAAGACGGCATAACGAGATTCCTCTACGTGACTGGAGTCTCTCTATGGGCAGTCGGTGA   |          |
| P713       | CAAGCAGAAGACGGCATAACGAGATAACTTCACGTGACTGGAGTCTCTCTATGGGCAGTCGGTGA   |          |
| P714       | CAAGCAGAAGACGGCATAACGAGATTGGAGAGGGTGACTGGAGTCTCTCTATGGGCAGTCGGTGA   |          |
| P715       | CAAGCAGAAGACGGCATAACGAGATACGCATCGGTGACTGGAGTCTCTCTATGGGCAGTCGGTGA   |          |
| P716       | CAAGCAGAAGACGGCATAACGAGATGTACCGTTGTGACTGGAGTCTCTCTATGGGCAGTCGGTGA   |          |
| P717       | CAAGCAGAAGACGGCATAACGAGATTACAGTTAGTGACTGGAGTCTCTCTATGGGCAGTCGGTGA   |          |
| P718       | CAAGCAGAAGACGGCATAACGAGATAATCAACTGTGACTGGAGTCTCTCTATGGGCAGTCGGTGA   |          |
| P719       | CAAGCAGAAGACGGCATAACGAGATGTACCTAGGTGACTGGAGTCTCTCTATGGGCAGTCGGTGA   |          |
| P720       | CAAGCAGAAGACGGCATAACGAGATCTGGAACAGTGACTGGAGTCTCTCTATGGGCAGTCGGTGA   |          |
| P721       | CAAGCAGAAGACGGCATAACGAGATGGTGACTAGTGACTGGAGTCTCTCTATGGGCAGTCGGTGA   |          |
| P722       | CAAGCAGAAGACGGCATAACGAGATGTGCAACCGTGACTGGAGTCTCTCTATGGGCAGTCGGTGA   |          |
| P723       | CAAGCAGAAGACGGCATAACGAGATGCCTGTCTGTGACTGGAGTCTCTCTATGGGCAGTCGGTGA   |          |
| P724       | CAAGCAGAAGACGGCATAACGAGATACTGATGGGTGACTGGAGTCTCTCTATGGGCAGTCGGTGA   |          |
| P725       | CAAGCAGAAGACGGCATAACGAGATATGCTAACGTGACTGGAGTCTCTCTATGGGCAGTCGGTGA   |          |
| P726       | CAAGCAGAAGACGGCATAACGAGATCACTGAGTGTGACTGGAGTCTCTCTATGGGCAGTCGGTGA   |          |
| P727       | CAAGCAGAAGACGGCATAACGAGATTAGGCCATGTGACTGGAGTCTCTCTATGGGCAGTCGGTGA   |          |
| P728       | CAAGCAGAAGACGGCATAACGAGATCAGCAGTCGTGACTGGAGTCTCTCTATGGGCAGTCGGTGA   |          |
| P729       | CAAGCAGAAGACGGCATAACGAGATTTCTGAGAGTGACTGGAGTCTCTCTATGGGCAGTCGGTGA   |          |
| P730       | CAAGCAGAAGACGGCATAACGAGATGGACGTTAGTGACTGGAGTCTCTCTATGGGCAGTCGGTGA   |          |
| P731       | CAAGCAGAAGACGGCATAACGAGATGTGTAGGTGTGACTGGAGTCTCTCTATGGGCAGTCGGTGA   |          |
| P732       | CAAGCAGAAGACGGCATAACGAGATCATCTCAGGTGACTGGAGTCTCTCTATGGGCAGTCGGTGA   |          |
| P733       | CAAGCAGAAGACGGCATAACGAGATGCATAGCAGTGACTGGAGTCTCTCTATGGGCAGTCGGTGA   |          |
| P734       | CAAGCAGAAGACGGCATAACGAGATCAGTGCACGTGACTGGAGTCTCTCTATGGGCAGTCGGTGA   |          |
| P735       | CAAGCAGAAGACGGCATAACGAGATTTCCGCATGTGACTGGAGTCTCTCTATGGGCAGTCGGTGA   |          |
| P736       | CAAGCAGAAGACGGCATAACGAGATCAACAGGTGTGACTGGAGTCTCTCTATGGGCAGTCGGTGA   |          |
| P737       | CAAGCAGAAGACGGCATAACGAGATAACACTCGGTGACTGGAGTCTCTCTATGGGCAGTCGGTGA   |          |
| P738       | CAAGCAGAAGACGGCATAACGAGATGCTCCTGACGTGACTGGAGTCTCTCTATGGGCAGTCGGTGA  |          |
| P739       | CAAGCAGAAGACGGCATAACGAGATGACGTAGAGTGACTGGAGTCTCTCTATGGGCAGTCGGTGA   |          |
| P740       | CAAGCAGAAGACGGCATAACGAGATGATTGGCAGTGACTGGAGTCTCTCTATGGGCAGTCGGTGA   |          |
| P741       | CAAGCAGAAGACGGCATAACGAGATGCCACGACGTGACTGGAGTCTCTCTATGGGCAGTCGGTGA   |          |
| P742       | CAAGCAGAAGACGGCATAACGAGATTTGTTACGGTGACTGGAGTCTCTCTATGGGCAGTCGGTGA   |          |
| P743       | CAAGCAGAAGACGGCATAACGAGATACGACCTAGTGACTGGAGTCTCTCTATGGGCAGTCGGTGA   |          |
| P744       | CAAGCAGAAGACGGCATAACGAGATTTGATAATGGTGACTGGAGTCTCTCTATGGGCAGTCGGTGA  |          |
| P745       | CAAGCAGAAGACGGCATAACGAGATGGTTCATGTGACTGGAGTCTCTCTATGGGCAGTCGGTGA    |          |
| P746       | CAAGCAGAAGACGGCATAACGAGATCCAGTATCGTGACTGGAGTCTCTCTATGGGCAGTCGGTGA   |          |
| P747       | CAAGCAGAAGACGGCATAACGAGATGTCCAGTGTGACTGGAGTCTCTCTATGGGCAGTCGGTGA    |          |
| P748       | CAAGCAGAAGACGGCATAACGAGATTAACCTTCGTGACTGGAGTCTCTCTATGGGCAGTCGGTGA   |          |
| Index1     | ATCACCGACTGCCCATAGAGAGGACTCCAGTAC (Custom sequencing primer Index1) |          |
| Read2      | GTGACTGGAGTCTCTCTATGGGCAGTCGGTGAT (Custom sequencing primer Read2)  |          |

## Reference

1. Li, H. & Durbin, R. Fast and accurate long-read alignment with Burrows-Wheeler transform. *Bioinformatics* **26**, 589–95 (2010).
2. Tsai, S. Q. *et al.* GUIDE-seq enables genome-wide profiling of off-target cleavage by CRISPR-Cas nucleases. *Nat. Biotechnol.* **33**, 187–198 (2015).
3. Zheng, Z. *et al.* Anchored multiplex PCR for targeted next-generation sequencing. *Nat. Med.* **20**, 1479–1484 (2014).
4. Bushnell, B. BBDMap (version 37.75) [Software]. Available at <https://sourceforge.net/projects/bbmap/> (2015).
5. Tsai, S. Q., Topkar, V. V., Joung, J. K. & Aryee, M. J. Open-source guideseq software for analysis of GUIDE-seq data. *Nat. Biotechnol.* (2016). doi:10.1038/nbt.3534
6. Minoche, A. E., Dohm, J. C. & Himmelbauer, H. Evaluation of genomic high-throughput sequencing data generated on Illumina HiSeq and Genome Analyzer systems. *Genome Biol.* **12**, R112 (2011).
7. Team, R. C. R: A Language and Environment for Statistical Computing. *Vienna, Austria* (2018).
8. Wickham, H. & Francois, R. Dplyr:Dplyr: a Grammar of Data Manipulation. *Cran* (2014).
9. Wickham, H. & Henry, L. tidyr: Easily Tidy Data with ‘spread()’ and ‘gather()’ Functions. *R Packag. version 0.8.0.* <https://CRAN.R-project.org/package=tidyr> (2018).
10. Valero-Mora, P. M. ggplot2: Elegant Graphics for Data Analysis . *J. Stat. Softw.* (2015). doi:10.18637/jss.v035.b01
11. Chen, H. & Boutros, P. C. VennDiagram: a package for the generation of highly-customizable Venn and Euler diagrams in R. *BMC Bioinformatics* **12**, 35 (2011).
